# Supplementary material for: Impact of gestational weight gain and prepregnancy body mass index on the prevalence of large-for-gestational age infants in two cohorts of women with type 1 insulin-dependent diabetes: a cross-sectional population study
Source: PubMed Central journal article supplement — BMJ Open. 2018 Mar 30;8(3):e019617. doi: 10.1136/bmjopen-2017-019617 (PMC5884363; doi:10.1136/bmjopen-2017-019617), 2018-03-30
Supplement: bmjopen-2017-019617.draft_revisions.pdf [file bmjopen-2017-019617.draft_revisions.pdf]

# BMJ Open

BMJ Open is committed to open peer review. As part of this commitment we make the peer review history of every article we publish publicly available.

When an article is published we post the peer reviewers' comments and the authors' responses online. We also post the versions of the paper that were used during peer review. These are the versions that the peer review comments apply to.

The versions of the paper that follow are the versions that were submitted during the peer review process. They are not the versions of record or the final published versions. They should not be cited or distributed as the published version of this manuscript.

BMJ Open is an open access journal and the full, final, typeset and author-corrected version of record of the manuscript is available on our site with no access controls, subscription charges or pay-per-view fees (<http://bmjopen.bmj.com>).

If you have any questions on BMJ Open's open peer review process please email [info.bmjopen@bmj.com](mailto:info.bmjopen@bmj.com)

# BMJ Open

## The impact of gestational weight gain and pre-pregnancy body mass index on the prevalence of large-for-gestational age infants in two cohorts of women with Type I Insulin-Dependent Diabetes: A cross-sectional population study

|                               |                                                                                                                                                                                                                                                                                                                                                                                                                                                                                                                                                                                                                                                                                                                    |
|-------------------------------|--------------------------------------------------------------------------------------------------------------------------------------------------------------------------------------------------------------------------------------------------------------------------------------------------------------------------------------------------------------------------------------------------------------------------------------------------------------------------------------------------------------------------------------------------------------------------------------------------------------------------------------------------------------------------------------------------------------------|
| Journal:                      | <i>BMJ Open</i>                                                                                                                                                                                                                                                                                                                                                                                                                                                                                                                                                                                                                                                                                                    |
| Manuscript ID                 | bmjopen-2017-019617                                                                                                                                                                                                                                                                                                                                                                                                                                                                                                                                                                                                                                                                                                |
| Article Type:                 | Research                                                                                                                                                                                                                                                                                                                                                                                                                                                                                                                                                                                                                                                                                                           |
| Date Submitted by the Author: | 15-Sep-2017                                                                                                                                                                                                                                                                                                                                                                                                                                                                                                                                                                                                                                                                                                        |
| Complete List of Authors:     | McWhorter, Ketrell; National Institute of Environmental Health Sciences, Epidemiology and Biostatistics; University of Cincinnati School of Medicine, Department of Environmental Health<br>Bowers, K; Cincinnati Children's Hospital Medical Center, Division of Biostatistics and Epidemiology<br>Dolan, Lawrence; Cincinnati Children's Hospital Medical Center, Division of Endocrinology<br>Deka, Ranjan; University of Cincinnati School of Medicine, Department of Environmental Health<br>Jackson, Chandra; National Institute of Environmental Health Sciences, Epidemiology and Biostatistics<br>Khoury, Jane; Cincinnati Children's Hospital Medical Center, Division of Biostatistics and Epidemiology |
| Keywords:                     | Diabetes in pregnancy < DIABETES & ENDOCRINOLOGY, PERINATOLOGY, Maternal medicine < OBSTETRICS                                                                                                                                                                                                                                                                                                                                                                                                                                                                                                                                                                                                                     |
|                               |                                                                                                                                                                                                                                                                                                                                                                                                                                                                                                                                                                                                                                                                                                                    |

SCHOLARONE™  
Manuscripts

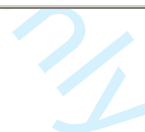

1  
2  
3 **The impact of gestational weight gain and pre-pregnancy body mass index on the**  
4 **prevalence of large-for-gestational age infants in two cohorts of women with Type**  
5 **I Insulin-Dependent Diabetes: A cross-sectional population study**  
6

7 Ketrell L. McWhorter, PhD, MBA <sup>1,2,3</sup>  
8 Katherine Bowers, PhD <sup>2</sup>  
9 Lawrence M. Dolan, MD <sup>4</sup>  
10 Ranjan Deka, PhD <sup>1</sup>  
11 Chandra L. Jackson, PhD, MS <sup>3</sup>  
12 Jane C. Khoury, PhD <sup>2,4</sup>  
13  
14  
15

16 <sup>1</sup> Department of Environmental Health, University of Cincinnati School of Medicine,  
17 Cincinnati, OH, USA

18 <sup>2</sup> Division of Biostatistics and Epidemiology, Cincinnati Children's Hospital Medical Center,  
19 Cincinnati, OH, USA

20 <sup>3</sup> Epidemiology Branch, National Institute of Environmental Health Sciences, National Institutes  
21 of Health, Department of Health and Human Services, Research Triangle Park, NC, USA

22 <sup>4</sup> Division of Endocrinology, Cincinnati Children's Hospital Medical Center, Cincinnati, OH, USA  
23  
24

25 Please direct correspondence to Dr. Ketrell L. McWhorter at 111 T.W. Alexander Drive, Building  
26 101, Room A353, Research Triangle Park, NC 27709, tel: (919) 316-4867, fax (301) 480-3290;  
27 email: [ketrell.mcwhorter@nih.gov](mailto:ketrell.mcwhorter@nih.gov).  
28

29 Word Count

30 Abstract: 295

31 Text: 3,212

32 Tables: 5

33 References: 35

34 Keywords: Type I Diabetes, pre-pregnancy body mass index,  
35 gestational weight gain, large-for-gestational age

36 Running Title: Gestational Weight Gain and LGA Infants of Mothers with  
37 T1DM

38 Date: September 15, 2017  
39  
40  
41  
42  
43  
44  
45  
46  
47  
48  
49  
50  
51  
52  
53  
54  
55  
56  
57  
58  
59  
60

1  
2  
3 **Objectives** Despite improvements in treatment modalities, large-for-gestational age (LGA)  
4 prevalence has remained between 30-40% among infants of mothers with Type I Insulin-  
5 Dependent Diabetes (T1DM). Our objective was to estimate LGA prevalence and examine the  
6 association between gestational weight gain (GWG) and pre-pregnancy body mass index (BMI)  
7 with LGA among mothers with T1DM.  
8  
9  
10  
11  
12

13  
14 **Design** Cross-sectional study.  
15

16  
17 **Setting** Regional data in Cincinnati, OH, from the Diabetes in Pregnancy Program Project  
18 (PPG), a prospective cohort for the period 1978-1993; national data from Consortium on Safe  
19 Labor (CSL), a multi-center cross-sectional study for the period 2002-2008.  
20  
21  
22

23  
24 **Participants** The study included 333 pregnancies in the PPG, and 358 pregnancies in the  
25 CSL. Pregnancies < 23 weeks' gestation were excluded. Women with T1DM in the PPG were  
26 identified according to physician confirmation of ketoacidosis, and or c-peptide levels, and by  
27 International Classification of Diseases (ICD)-9 codes within the CSL. LGA was identified as  
28 birthweight > 90th percentile according to gestational age, race and sex.  
29  
30  
31  
32  
33  
34  
35

36 **Main outcome measure** LGA at birth.  
37

38  
39 **Results** Mean  $\pm$  standard deviation maternal age at delivery was 26.4  $\pm$ 5.1 years for PPG  
40 women and 27.5  $\pm$ 6.0 years for CSL women,  $p=0.008$ . LGA prevalence did not significantly  
41 change between cohorts (PPG: 40.2% vs CSL: 36.6%,  $p=0.32$ ). More women began pregnancy  
42 as overweight in the later cohort (PPG (16.8%) vs CSL (27.1%),  $p<0.001$ ). GWG exceeding  
43 Institute of Medicine (IOM) guidelines increased from PPG (42.3%) to CSL (56.2%),  
44  $p<0.001$ . Normal weight women with GWG within IOM guidelines was associated with reduced  
45 LGA prevalence in CSL (PPG: 30.6% vs CSL: 13.7%),  $p=0.001$ .  
46  
47  
48  
49  
50  
51  
52  
53  
54  
55  
56  
57  
58  
59  
60

1  
2  
3 **Conclusions** Normal weight women with GWG within IOM guidelines experienced a reduction  
4  
5 in LGA prevalence, supporting the importance of adherence to IOM guidelines for GWG to  
6  
7 reduce LGA. Increasing BMI and GWG may be hindering a reduction in LGA prevalence.  
8  
9  
10  
11  
12  
13  
14  
15  
16  
17  
18  
19  
20  
21  
22  
23  
24  
25  
26  
27  
28  
29  
30  
31  
32  
33  
34  
35  
36  
37  
38  
39  
40  
41  
42  
43  
44  
45  
46  
47  
48  
49  
50  
51  
52  
53  
54  
55  
56  
57  
58  
59  
60

For peer review only

## Key words

Type I Diabetes

Pre-pregnancy body mass index

Gestational weight gain

Large-for-gestational age

## Strengths and limitations of this study

- We had access to two cohorts of women with T1DM across a 30-year time period covering an era of major advancements in insulin treatment and delivery, and emergence of obesity as a prevalent chronic disease, potentially representing opposing risks for delivery of a large-for-gestational age (LGA) baby.
- The Diabetes in Pregnancy Program Project (PPG) cohort includes frequent, repeated observations of women during pregnancy while the Consortium on Safe Labor (CSL) provides a national, contemporary large-scale database.
- Glucose control was not available in CSL precluding comparison between groups.
- The potential differences between local (PPG) and national (CSL) populations include regional differences in diet, methods of treatment, racial composition and geography, limiting the generalizability of our results.
- Despite the importance of nephropathy and retinopathy as indicators of diabetes severity potentially affecting glucose transport, differing definitions between the cohorts prevented variable harmonization and were, therefore, not included in our study.

## BACKGROUND

Despite advancements in insulin treatment and delivery for those with Type I Insulin-Dependent Diabetes (T1DM)<sup>1,2</sup>, the prevalence of neonatal large-for-gestational age (LGA) among women in this population remains high<sup>1,3-5</sup>. LGA prevalence has remained at 30-40% among infants of mothers with T1DM<sup>5-7</sup>. Independently associated maternal factors for LGA include maternal age, race, stature/height<sup>8</sup>, ethnicity and parity<sup>5,9-12</sup>, excessive fetal nutrition<sup>13</sup> mediated by maternal hyperglycemia<sup>2</sup>, excessive gestational weight gain (GWG)<sup>5,14-16</sup> and pre-pregnancy body mass index (BMI)<sup>10,14,17,18</sup>. LGA infants of mothers with diabetes are at increased risk for fetal distress<sup>6</sup> leading to cesarean section<sup>19</sup>, and also obesity<sup>20-22</sup>, insulin resistance (IR)<sup>20</sup>, type II diabetes mellitus (T2DM) and cardiovascular compromise<sup>23,24</sup> in adolescence and adulthood.

The steady state of higher perinatal birthweight among offspring of mothers with T1DM, even in the presence of tight glucose control, has promoted studies that emphasize the independent role of both increased rates of pre-pregnancy BMI<sup>19</sup> and excessive GWG<sup>15</sup> on neonatal outcome. According to data from NHANES, between 2011 and 2014, nearly 34% of women aged 20-39 years were obese<sup>25</sup>. Most recently, among all women who delivered a live infant in 2014, nearly 50% had a pre-pregnancy BMI of either overweight (25.6%) or obese (24.8%)<sup>25</sup>.

In addition to the trend in increasing pre-pregnancy BMI, more women are gaining weight in excess of the 2009 Institute of Medicine (IOM) guidelines for GWG<sup>26-28</sup>. According to the IOM and National Research Council in "Reexamining the Guidelines", there has been an upward trend in GWG from 1990-2005<sup>28</sup>. Given these two trends and the link between the hyperglycemic intrauterine environment and fetal overnutrition<sup>19,29,30</sup>, women with T1DM belonging to higher BMI subgroups, who exceed IOM guidelines for GWG, may be at the greatest risk of LGA.

In an effort to understand the implications of excessive GWG and pre-pregnancy BMI within this population, we compared LGA infants observed in the Diabetes in Pregnancy

1  
2  
3 Program Project (PPG), a cohort of women with T1DM going through pregnancy, studied from  
4 1978 to 1993, to those in the Consortium on Safe Labor (CSL), a more contemporary T1DM  
5 population delivering between 2002 and 2008. We aim to establish the potential change in  
6 prevalence of LGA among infants exposed to maternal T1DM between 1978-1993 and 2002-  
7 2008. We also aim to determine associations between adherence to IOM guidelines for GWG  
8 and LGA outcome among mothers with T1DM, across pre-pregnancy BMI categories, to identify  
9 subgroups who may be at highest risk for LGA. These findings will help interpret the literature  
10 on IOM guidelines for GWG in the T1DM population as well as inform future research focusing  
11 on reducing LGA births among infants exposed to maternal hyperglycemic environments.  
12  
13  
14  
15  
16  
17  
18  
19  
20  
21  
22

## 23 RESEARCH DESIGN AND METHODS

24  
25  
26 **Diabetes in Pregnancy Program Project (PPG):** The PPG study enrolled 303 women  
27 with T1DM in a cohort in Cincinnati, Ohio from 1978-1993 for a total of 372 pregnancies going  
28 beyond 23 weeks' gestation. After exclusions (see below), the analytic population included 333  
29 pregnancies. Participants in the PPG were recruited preconceptionally or during the first half of  
30 the pregnancy period as part of a program funded by the National Institute of Health (NIH) in  
31 order to examine the impact of strict glycemic control during pregnancy on the rate of adverse  
32 maternal and neonatal outcomes in mothers with T1DM. The interdisciplinary core of this study  
33 involved endocrinologists, perinatologists, and neonatologists. T1DM study subjects recruited  
34 and enrolled into the program belonged to White's classification B to RT<sup>31</sup>. Two levels of  
35 glycemic control were defined to manage diabetes care: subjects enrolling prior to 9 completed  
36 weeks of gestation were randomized to strict or customary glycemic control. A third group  
37 included women enrolling after 9 completed weeks' gestation; they were managed according to  
38 customary glycemic control. Fasting blood glucose and 90-minute post-prandial glucose targets  
39 for strict glycemic control were: <100 mg/dl and <120 mg/dl respectively; for customary glycemic  
40 control: <120 mg/dl and <140 mg/dl, respectively<sup>31</sup>. Extensive gestational and outcome data  
41  
42  
43  
44  
45  
46  
47  
48  
49  
50  
51  
52  
53  
54  
55  
56  
57  
58  
59  
60



1  
2  
3 were collected including weekly weight, blood pressure, insulin requirements, urinalysis and  
4 medication use, multiple daily glucose concentrations and detailed delivery and neonatal  
5 outcome information.  
6  
7  
8

9 **Consortium on Safe Labor (CSL):** The CSL study enrolled 208,695 women in a  
10 national multi-center observational study from 2002-2008 for a total of 228,562 deliveries. A  
11 total of 594 singleton T1DM pregnancies with delivery at  $\geq 23$  weeks' gestation were identified.  
12 After exclusions, the analytic population included 358 pregnancies. There were 11 (out of 12)  
13 sites represented in the CSL sample of pregnancy complicated by T1DM.  
14  
15  
16  
17  
18

19 The National Institute of Child Health and Human Development (NIHCD), of the NIH,  
20 initiated a retrospective, observational study in a contemporary U.S. obstetric population to  
21 reexamine labor progression trends that have long been guided by the Friedman curve. The  
22 CSL study included medical records from a population of women from a consortium of 12 U.S.  
23 hospitals located across 9 districts of the American College of Obstetricians and Gynecologists  
24 and has been described in detail elsewhere<sup>32</sup>. Briefly, patient electronic medical records were  
25 extracted, de-identified and entered into a Data Coordinating database which maintained over  
26 225,000 deliveries  $\geq 23$  weeks' gestation from 2002 to 2008. Each delivery included ICD-9  
27 codes as well as information related to maternal demographics, maternal weight (kg) and height  
28 (m) at admission, prenatal history, preeclampsia, blood pressure, reports of uterine and intra-  
29 amniotic infections, anesthesia, obstetric trauma, medication, delivery method, infant  
30 birthweight, length, Apgar scores at 1 and 5 minutes, gestational age at delivery and post-natal  
31 time spent in the neurointensive care unit (NICU). Data received by the Data Coordinating  
32 Center from each clinical site was mapped to pre-defined codes for each variable. Data  
33 underwent inquiries, cleaning, recoding and logic checking. In addition, validation studies were  
34 performed to ensure electronic medical records accurately represented medical record charts<sup>32</sup>.  
35  
36  
37  
38  
39  
40  
41  
42  
43  
44  
45  
46  
47  
48  
49  
50  
51  
52

53 Inclusion and exclusion criteria for the current study were identical for each study cohort.  
54 Inclusion criteria included T1DM and gestation at 23 completed weeks or later. Exclusion criteria  
55  
56  
57

1  
2  
3 were multiple gestation, fetal anomaly, stillbirth, and missing the outcome and primary exposure  
4 variables; birthweight of the neonate, maternal pre-pregnancy and delivery weight and maternal  
5 height. No exclusions were made regarding race/ethnicity or age. For women with more than  
6 one pregnancy during the study, all pregnancies were included. In addition, no exclusions were  
7 made in the CSL based on geographic site.  
8  
9  
10  
11  
12

13  
14 GWG and pre-pregnancy BMI were the primary exposures of interest, and LGA was the  
15 outcome of interest. Potential confounding maternal characteristics of interest included maternal  
16 age at delivery, race, parity and preeclampsia. Pre-pregnancy BMI was additionally treated as a  
17 potential modifier of the relationship between GWG and LGA. IRB approval was obtained from  
18 Cincinnati Children's Hospital Medical Center as well as the University of Cincinnati prior to the  
19 secondary analysis of PPG and CSL cohorts.  
20  
21  
22  
23  
24  
25  
26  
27

## 28 **Statistical Analysis**

29  
30 In two different cohorts, we conducted an analysis on mothers with T1DM who had  
31 singleton pregnancies. Women with T1DM in the PPG study were identified according to  
32 physician confirmation of ketoacidosis, and or c-peptide levels. Within the CSL cohort,  
33 International Classification of Diseases (ICD)-9 codes 250.01, 250.03, 250.21, 250.23, 250.31,  
34 250.33, 250.41, 250.43, 250.51, 250.53, 250.61, 250.63, 250.71, 250.73, 250.81, 250.83,  
35 250.91, 250.93 were utilized to identify women with T1DM. To determine LGA classification for  
36 each cohort, a McNemar's test of marginal homogeneity was performed comparing Lubchenco  
37 curves to both Cincinnati-based reference population growth curves for PPG and medical chart  
38 LGA classifications for CSL. LGA was finally defined as birthweight > 90th percentile and was  
39 classified by gestational age-, race- and sex-specific curves according to Lubchenco<sup>33</sup> for the  
40 PPG cohort and by the extracted variable from detailed medical chart review for CSL. Pre-  
41 pregnancy BMI was calculated by using self-reported weight prior to pregnancy and height,  
42 recorded at the initial visit for women in the PPG and at the labor and delivery admission for  
43  
44  
45  
46  
47  
48  
49  
50  
51  
52  
53  
54  
55  
56  
57

1  
2  
3 women in the CSL. Underweight, normal weight, overweight and obese pre-pregnancy BMI  
4 classifications were defined as:  $BMI < 18.5 \text{ kg/m}^2$ ;  $18.5 \leq BMI < 25 \text{ kg/m}^2$ ,  $25 \leq BMI < 30 \text{ kg/m}^2$  and  
5  $BMI \geq 30 \text{ kg/m}^2$ , respectively. GWG was defined as weight at admission for delivery minus pre-  
6 pregnancy weight (kg). IOM adherence for GWG was categorized utilizing the pre-pregnancy  
7 BMI-specific 2009 guidelines as under, within (underweight: 12.5-18.0 kg; normal: 11.5-16.0 kg;  
8 overweight: 7.0-11.5 kg; obese (all classes): 5.0-9.0 kg) or over IOM guidelines. Calculations for  
9 recommended weight gain assume a 0.5-2.0 kg weight gain in the first trimester<sup>28</sup>. Variables  
10 within PPG and CSL were harmonized for comparative analysis. Race was based on self-  
11 identification, and was categorized as black, white or other. Due to the small number of obese  
12 women in the PPG cohort, overweight and obese BMI categories were combined for analysis.  
13 Continuous and categorical variables are represented with mean ( $\pm$ SD) and n (%), respectively.  
14 Maternal characteristics were compared between and within cohorts by LGA status and by  
15 adherence to IOM guidelines for GWG (under, within and over) using Chi-square or Fisher's  
16 exact test, and analysis of variance (ANOVA) or Wilcoxon rank sum, as appropriate. Normality  
17 testing for distribution of continuous variables was performed by examining histograms, stem-  
18 leaf plots, and Kolmogorov-Smirnov tests. A site frequency distribution was examined to  
19 investigate possible bias in site representation in the CSL sample. Bonferroni was used to  
20 adjust for multiple testing. Generalized Estimating Equations (GEE) were used to estimate the  
21 odds ratio (OR) of giving birth to an LGA infant for women exceeding IOM guidelines vs women  
22 who adhered to IOM guidelines to account for inherent correlation among women with multiple  
23 pregnancies in each study. General linear models were used to examine the relationships  
24 between GWG and birthweight. To determine whether IOM adherence varied across BMI  
25 categories ( $18.5 \leq BMI < 25$ ,  $25 \leq BMI < 30$ ,  $BMI \geq 30 \text{ kg/m}^2$ ) interaction terms were used to evaluate  
26 effect modification. Normal weight women within IOM guidelines for GWG was used as the  
27 reference category. Models adjusted for potential confounders, selected a priori as risk factors  
28 for GWG and LGA and not on the causal pathway, included age, race, parity, pre-pregnancy  
29  
30  
31  
32  
33  
34  
35  
36  
37  
38  
39  
40  
41  
42  
43  
44  
45  
46  
47  
48  
49  
50  
51  
52  
53  
54  
55  
56  
57  
58  
59  
60

1  
2  
3 BMI and preeclampsia. All tests for significance were two-sided and a *p*-value of less than 0.05  
4  
5 was considered statistically significant, appropriately adjusted as necessary. Statistical  
6  
7 analyses were completed using SAS® software version 9.4 (SAS Institute, Cary NC).  
8  
9

## 11 RESULTS

12  
13 Table 1 shows maternal characteristics and neonatal outcomes in each cohort. Mean  
14  
15 age at delivery was significantly higher for women in the CSL (27.5±6.0) than for women in the  
16  
17 PPG (26.4±5.1), *p*=0.008. There was a higher proportion of black women in the CSL (19.3%)  
18  
19 than in the PPG (14.1%). The CSL had a significantly greater proportion of overweight/obese  
20  
21 women (51.4%) than the PPG (20.7%), *p*<0.001. More women exceeded IOM guidelines for  
22  
23 GWG in the CSL (56.2%) than in the PPG (42.3%), *p*<0.001, with overweight/obese women  
24  
25 accounting for 58.7% and 41.1% of all women who exceeded guidelines, respectively (table  
26  
27 S1).  
28  
29  
30  
31  
32  
33  
34  
35  
36  
37  
38  
39  
40  
41  
42  
43  
44  
45  
46  
47  
48  
49  
50  
51  
52  
53  
54  
55  
56  
57  
58  
59  
60

Table 1. Maternal characteristics and neonatal outcomes in PPG (1978-1993) and CSL (2002-2008) cohorts

|                                                                  | PPG        | CSL        |         |
|------------------------------------------------------------------|------------|------------|---------|
| Maternal Characteristics                                         | n=333      | n=358      | p value |
| Maternal age at delivery (years)                                 | 26.4 ± 5.1 | 27.5 ± 6.0 | 0.008   |
| Married, yes <sup>b</sup>                                        | 224 (67.3) | 217 (60.6) | 0.01    |
| Race                                                             |            |            | <0.001  |
| White                                                            | 282 (84.7) | 225 (62.8) |         |
| Black                                                            | 47 (14.1)  | 69 (19.3)  |         |
| Other                                                            | 4 (1.20)   | 64 (17.9)  |         |
| Nulliparous, yes                                                 | 166 (49.9) | 183 (51.1) | 0.74    |
| Pre-pregnancy BMI (kg/m <sup>2</sup> )                           | 23.0 ± 3.4 | 26.9 ± 6.3 | <0.001  |
| Pre-pregnancy BMI category                                       |            |            | <0.001  |
| Underweight (BMI<18.5 kg/m <sup>2</sup> )                        | 11 (3.3)   | 6 (1.7)    |         |
| Normal (18.5 kg/m <sup>2</sup> ≤BMI<25.0 kg/m <sup>2</sup> )     | 253 (76.0) | 168 (46.9) |         |
| Overweight (25.0 kg/m <sup>2</sup> ≤BMI<30.0 kg/m <sup>2</sup> ) | 56 (16.8)  | 97 (27.1)  |         |
| Obese (BMI≥30.0 kg/m <sup>2</sup> )                              | 13 (3.90)  | 87 (24.3)  |         |
| Pre-pregnancy Overweight/Obese                                   | 69 (20.7)  | 184 (51.4) | <0.001  |
| Gestational Weight Gain (kg)                                     | 14.4 ± 5.6 | 14.5 ± 7.4 | 0.77    |
| IOM Guidelines                                                   |            |            |         |
| Under                                                            | 74 (22.2)  | 62 (17.3)  | <0.001  |
| Within                                                           | 118 (35.5) | 95 (26.5)  |         |
| Over                                                             | 141 (42.3) | 201 (56.2) |         |
| Preeclampsia, yes                                                | 50 (15.0)  | 55 (15.4)  | 0.90    |
| Previous cesarean section, yes <sup>b</sup>                      | 105 (31.6) | 86 (24.0)  | 0.08    |
| Cesarean section, yes                                            | 233 (70.0) | 239 (66.8) | 0.36    |
| Preterm delivery, yes                                            |            |            |         |
| Delivery prior to 34 weeks                                       | 33 (9.9)   | 48 (13.4)  | 0.15    |
| Delivery prior to 37 weeks                                       | 114 (34.2) | 152 (42.6) | 0.03    |
| Neonatal Outcomes <sup>a</sup>                                   |            |            |         |
| Male                                                             | 186 (56.2) | 193 (53.9) | 0.60    |
| Respiratory distress during labor                                | 37 (11.1)  | 45 (12.8)  | 0.49    |
| Gestational age (weeks)                                          | 37.0 ± 2.4 | 36.1 ± 2.7 | <0.001  |
| Apgar less than 7 (@5 min)                                       | 59 (17.7)  | 23 (6.4)   |         |

Mean ± SD are shown for all continuous variables and n (%) are shown for categorical variables; PPG: Diabetes in Pregnancy Program Project; CSL: Consortium on Safe Labor.

<sup>a</sup> Neonatal outcomes exclude stillbirths and neonatal deaths

<sup>b</sup> PPG: Marital status missing for 11 women; CSL: Previous cesarean section missing for 20 women.

There was no significant difference in cesarean section rate between the CSL (66.8%) and PPG (70.0%), p=0.36. Women were more likely to deliver at less than 37 weeks' in the CSL (42.6%) than in the PPG (34.2%), p=0.03.

While we observed no difference in overall LGA prevalence between cohorts (CSL: 36.6% vs. PPG: 40.2%,  $p=0.32$ ), Table 2 shows a lower prevalence of LGA among women in CSL compared with PPG (13.7% versus 30.6%) who were normal weight and gained within IOM guidelines.

Table 2. Large-for-Gestational Age prevalence within each BMI and IOM adherence subgroup for women in PPG (1978-1993) and CSL (2002-2008) cohorts

| IOM adherence | Pre-pregnancy BMI | PPG |     |                    | CSL |     |                   | <i>p</i> value |
|---------------|-------------------|-----|-----|--------------------|-----|-----|-------------------|----------------|
|               |                   | N   | LGA | % LGA <sup>a</sup> | N   | LGA | %LGA <sup>a</sup> |                |
| under         | underweight       | 4   | 1   | 0.7%               | 2   | 1   | 0.8%              | -              |
| under         | normal            | 67  | 20  | 14.9%              | 33  | 8   | 6.1%              | -              |
| under         | overweight/obese  | 3   | 1   | 0.7%               | 27  | 6   | 4.6%              | -              |
| within        | underweight       | 7   | 3   | 2.2%               | 3   | 0   | 0.0%              | 0.09           |
| within        | normal            | 103 | 41  | 30.6%              | 53  | 18  | 13.7%             | 0.001          |
| within        | overweight/obese  | 8   | 0   | 0.0%               | 39  | 12  | 9.2%              | 0.0003         |
| over          | underweight       | 0   | 0   | 0.0%               | 1   | 0   | 0.0%              | -              |
| over          | normal            | 83  | 38  | 28.4%              | 82  | 37  | 28.2%             | 0.94           |
| over          | overweight/obese  | 58  | 30  | 22.4%              | 118 | 49  | 37.4%             | 0.008          |
| Total         |                   | 333 | 134 | 40.2%              | 358 | 131 | 36.6%             | 0.32           |

IOM=Institute of Medicine; BMI=body mass index ( $\text{kg}/\text{m}^2$ ); LGA=large-for-gestational age; PPG: Diabetes in Pregnancy Program Project; CSL: Consortium on Safe Labor.

<sup>a</sup> % LGA for each IOM guideline adherence and pre-pregnancy BMI category are presented as proportions of total LGA infants for each category.

BMI was defined as: underweight ( $\text{BMI} < 18.5 \text{ kg}/\text{m}^2$ ); normal ( $18.5 \text{ kg}/\text{m}^2 \leq \text{BMI} < 25.0 \text{ kg}/\text{m}^2$ ); overweight ( $25.0 \text{ kg}/\text{m}^2 \leq \text{BMI} < 30.0 \text{ kg}/\text{m}^2$ ); obese ( $\text{BMI} \geq 30.0 \text{ kg}/\text{m}^2$ ).

The distribution of LGA by BMI categories has significantly changed over time (see table 3). While normal weight women still have the highest proportion of LGA infants in both the CSL and PPG (48.1% vs 73.9%), there was an increase in overweight women delivering LGA infants over time, from 17.2% (PPG) to 29.8% (CSL),  $p < .0001$ . Normal weight women in the CSL, on average, gained 2.4 kg more over gestation than normal weight women in the PPG. In contrast, overweight women in the CSL, on average, gained 2.6 kg less than overweight women in the PPG (table S2).

Table 3. Maternal characteristics of women in PPG (1978-1993) and CSL (2002-2008) cohorts by LGA classification

| Characteristic                                                   | PPG           |            |         | CSL        |            |         |
|------------------------------------------------------------------|---------------|------------|---------|------------|------------|---------|
|                                                                  | LGA Lubchenco | non-LGA    | p value | LGA Chart  | non-LGA    | p value |
| n (%)                                                            | 134 (40.2)    | 199 (59.8) |         | 131 (36.6) | 227 (63.4) |         |
| Maternal age at delivery, years                                  | 26.5±4.9      | 26.4±5.2   | 0.83    | 27.5 ±6.1  | 27.6±6.0   | 0.92    |
| Married, yes                                                     | 94 (70.1)     | 130 (65.3) | 0.08    | 87 (66.4)  | 130 (57.3) | 0.09    |
| Race                                                             |               |            | 0.36    |            |            | 0.001   |
| White                                                            | 118 (88.1)    | 164 (82.4) |         | 97 (74.1)  | 128 (56.4) |         |
| Black                                                            | 15 (11.2)     | 32 (16.1)  |         | 13 (9.9)   | 56 (24.7)  |         |
| Other                                                            | 1 (0.78)      | 3 (1.5)    |         | 21 (16.0)  | 43 (18.9)  |         |
| Nulliparous, yes                                                 | 59 (44.0)     | 107 (53.8) | 0.08    | 60 (45.8)  | 123 (54.2) | 0.13    |
| Pre-pregnancy BMI (kg/m <sup>2</sup> )                           | 23.3±3.6      | 22.7±3.2   | 0.9     | 26.7±5.8   | 26.9±6.5   | 0.77    |
| Pre-pregnancy BMI category                                       |               |            | 0.45    |            |            | 0.5     |
| Underweight (BMI<18.5 kg/m <sup>2</sup> )                        | 4 (3.0)       | 7 (3.5)    |         | 1 (0.76)   | 5 (2.2)    |         |
| Normal (18.5 kg/m <sup>2</sup> ≤BMI<25.0 kg/m <sup>2</sup> )     | 99 (73.9)     | 154 (77.4) |         | 63 (48.1)  | 105 (46.3) |         |
| Overweight (25.0 kg/m <sup>2</sup> ≤BMI<30.0 kg/m <sup>2</sup> ) | 23 (17.2)     | 33 (16.6)  |         | 39 (29.8)  | 58 (25.6)  |         |
| Obese (BMI≥30.0 kg/m <sup>2</sup> )                              | 8 (6.0)       | 5 (2.5)    |         | 28 (21.4)  | 59 (26.0)  |         |
| Pre-pregnancy Overweight/Obese                                   | 31 (23.1)     | 38 (19.1)  | 0.38    | 67 (51.2)  | 117 (51.5) | 0.94    |
| Gestational Weight Gain (kg)                                     | 15.7±5.4      | 13.5±5.7   | <.0001  | 16.3±7.2   | 13.5±7.3   | 0.0004  |
| IOM Guidelines                                                   |               |            | 0.02    |            |            | 0.01    |
| Under                                                            | 22 (16.4)     | 52 (26.1)  |         | 15 (11.5)  | 47 (20.7)  |         |
| Within                                                           | 44 (32.8)     | 74 (37.2)  |         | 30 (22.9)  | 65 (28.6)  |         |
| Over                                                             | 68 (50.8)     | 73 (36.7)  |         | 86 (65.7)  | 115 (50.7) |         |
| Preeclampsia, yes                                                | 11 (8.2)      | 39 (19.6)  | 0.004   | 19 (14.5)  | 36 (15.9)  | 0.73    |
| Previous cesarean section, yes                                   | 45 (33.8)     | 60 (30.2)  | 0.48    | 38 (29.9)  | 48 (22.8)  | 0.14    |
| Cesarean section, yes                                            | 97 (72.4)     | 136 (68.3) | 0.43    | 91 (69.5)  | 148 (65.2) | 0.41    |
| Preterm delivery                                                 |               |            |         |            |            |         |
| Delivery prior to 34 weeks                                       | 6 (4.5)       | 27 (13.6)  | 0.007   | 11 (8.4)   | 37 (16.3)  | 0.03    |
| Delivery prior to 37 weeks                                       | 38 (28.4)     | 76 (38.2)  | 0.06    | 55 (42.0)  | 97 (42.7)  | 0.89    |
| Neonatal Outcomes                                                |               |            |         |            |            |         |
| Male                                                             | 81 (61.4)     | 105 (52.8) | 0.12    | 71 (54.2)  | 122 (54.2) | 1.0     |
| Respiratory distress during labor                                | 11 (8.2)      | 26 (13.1)  | 0.17    | 16 (12.5)  | 29 (13.0)  | 0.89    |
| Gestational Age, weeks                                           | 37.5±1.9      | 36.6±2.7   | 0.001   | 36.3±2.2   | 36.0±3.0   | 0.22    |
| Apgar less than 7 (@5 min)                                       | 20 (14.9)     | 39 (19.6)  | 0.27    | 9 (6.87)   | 14 (6.2)   | 0.79    |

Mean ± SD are shown for all continuous variables and n(%) are shown for categorical variables

IOM=Institute of Medicine; BMI=body mass index (kg/m<sup>2</sup>); LGA=large-for-gestational age; PPG=Diabetes in Pregnancy Program Project; CSL=Consortium on Safe Labor.

LGA was defined as infants with a birthweight >90th percentile, adjusted for age, sex and race.

Neonatal outcomes exclude stillbirths and neonatal deaths.

Table 4 shows separate associations between pre-pregnancy BMI and GWG with odds of LGA for all women in each cohort. Entering pregnancy with higher BMI did not appear to be an independent predictor of LGA in either group.

Table 4. Association between abnormal pre-pregnancy BMI and unrecommended gestational weight gain compared to normal weight participants within IOM adherence guidelines among PPG (1978-1993) and CSL (2002-2008) study cohorts

| PPG                            | Model I           | Model II          | Model III         |
|--------------------------------|-------------------|-------------------|-------------------|
|                                | OR (95% CI)       | OR (95% CI)       | OR (95% CI)       |
| <b>Pre-pregnancy BMI</b>       |                   |                   |                   |
| Normal/Underweight             | 1.00 (ref)        | 1.00 (ref)        | -                 |
| Overweight/Obese               | 1.28 (0.70, 2.32) | 1.44 (0.79, 2.63) | -                 |
| <b>Gestational Weight Gain</b> |                   |                   |                   |
| Under                          | 0.71 (0.39, 1.31) | 0.76 (0.41, 1.41) | 0.76 (0.41, 1.42) |
| Within                         | 1.00 (ref)        | 1.00 (ref)        | 1.00 (ref)        |
| Over                           | 1.57 (0.92, 2.65) | 1.55 (0.90, 2.67) | 1.53 (0.86, 2.71) |
| <b>CSL</b>                     |                   |                   |                   |
|                                | Model I           | Model II          | Model III         |
|                                | OR (95% CI)       | OR (95% CI)       | OR (95% CI)       |
| <b>Pre-pregnancy BMI</b>       |                   |                   |                   |
| Underweight                    | 0.33 (0.04, 2.92) | 0.38 (0.03, 4.21) | -                 |
| Normal                         | 1.00 (ref)        | 1.00 (ref)        | -                 |
| Overweight                     | 1.12 (0.67, 1.87) | 1.32 (0.77, 2.26) | -                 |
| Obese                          | 0.79 (0.46, 1.36) | 1.04 (0.58, 1.86) | -                 |
| <b>Gestational Weight Gain</b> |                   |                   |                   |
| Under                          | 0.69 (0.33, 1.43) | 0.75 (0.35, 1.60) | 0.73 (0.34, 1.58) |
| Within                         | 1.00 (ref)        | 1.00 (ref)        | 1.00 (ref)        |
| Over                           | 1.62 (0.97, 2.72) | 1.54 (0.91, 2.63) | 1.46 (0.84, 2.52) |

OR=odds ratio (95% confidence interval); IOM=Institute of Medicine; BMI=body mass index ( $\text{kg}/\text{m}^2$ ); LGA=large-for-gestational age; PPG: Diabetes in Pregnancy Program Project; CSL: Consortium on Safe Labor.

Model I - Adjusted for age

Model II - Adjusted for Model I + maternal race, parity, preeclampsia

Model III - Adjusted for Model II + pre-pregnancy BMI

BMI was defined as: underweight ( $\text{BMI} < 18.5 \text{ kg}/\text{m}^2$ ); normal ( $18.5 \text{ kg}/\text{m}^2 \leq \text{BMI} < 25.0 \text{ kg}/\text{m}^2$ ); overweight ( $25.0 \text{ kg}/\text{m}^2 \leq \text{BMI} < 30.0 \text{ kg}/\text{m}^2$ ); obese ( $\text{BMI} \geq 30.0 \text{ kg}/\text{m}^2$ ).

When considering all BMI groups collectively, exceeding IOM guidelines for GWG vs. remaining within IOM guidelines was not a significant predictor of increased risk for LGA in either cohort.

The OR adjusted for age for mothers who exceeded IOM guidelines compared to those who remained within guidelines was similar for women in the CSL [OR 1.60, 95%CI (0.95, 2.68),  $p=0.08$ ] compared to mothers in the PPG [OR 1.57, 95%CI (0.92, 2.65),  $p=0.10$ ]. There was



also no significant difference in average total GWG between the groups,  $14.5 \pm 7.4$  for CSL and  $14.4 \pm 5.6$  for PPG ( $p=0.77$ ). There remained no significant increase in risk of LGA after further adjustments for covariates and pre-pregnancy BMI for either group.

In the CSL, normal weight women who exceeded IOM guidelines [OR 2.14 95%CI (1.17, 3.91),  $p=0.01$ ] and overweight women who exceeded IOM guidelines [OR 2.35 95%CI (1.26, 4.40),  $p=0.01$ ] had an increased odds of LGA after adjusting for age when compared to the normal weight women who did not exceed IOM guidelines, as shown in Table 5.

Table 5. Adjusted odds ratios (95% CI) for LGA by abnormal pre-pregnancy BMI and unrecommended gestational weight gain compared to normal weight participants within IOM adherence guidelines among PPG (1978-1993) and CSL (2002-2008) cohorts

|               |                    | Model I     |                   | Model II       |                   |                |
|---------------|--------------------|-------------|-------------------|----------------|-------------------|----------------|
| <b>PPG</b>    |                    | OR (95% CI) |                   | OR (95% CI)    |                   |                |
| IOM adherence | Pre-pregnancy BMI  | n           |                   | <i>p</i> value |                   | <i>p</i> value |
| within        | normal/underweight | 110         | 1.00 (ref)        |                | 1.00 (ref)        |                |
| within        | overweight/obese   | 8           | -                 |                | -                 |                |
| over          | normal/underweight | 83          | 1.61 (0.93, 2.80) | 0.09           | 1.48 (0.83, 2.64) | 0.18           |
| over          | overweight/obese   | 58          | 2.04 (1.05, 3.97) | <b>0.03</b>    | 2.12 (1.11, 4.04) | <b>0.02</b>    |
|               |                    | Model I     |                   | Model II       |                   |                |
| <b>CSL</b>    |                    | OR (95% CI) |                   | OR (95% CI)    |                   |                |
| IOM adherence | Pre-pregnancy BMI  | n           |                   |                |                   |                |
| within        | Normal             | 56          | 1.00 (ref)        |                | 1.00 (ref)        |                |
| within        | Overweight         | 15          | 0.38 (0.08, 1.81) | 0.23           | 0.53 (0.10, 2.73) | 0.45           |
| within        | Obese              | 23          | 1.86 (0.75, 4.60) | 0.18           | 1.99 (0.79, 5.01) | 0.15           |
| over          | Normal             | 82          | 2.14 (1.17, 3.91) | <b>0.01</b>    | 1.83 (0.99, 3.40) | 0.06           |
| over          | Overweight         | 70          | 2.35 (1.26, 4.40) | <b>0.01</b>    | 2.25 (1.18, 4.28) | <b>0.01</b>    |
| over          | Obese              | 49          | 1.26 (0.61, 2.59) | 0.53           | 1.49 (0.70, 3.19) | 0.30           |

OR=odds ratio; 95% confidence interval (CI); IOM=Institute of Medicine; BMI=body mass index ( $\text{kg}/\text{m}^2$ ); LGA=large-for-gestational age; PPG: Diabetes in Pregnancy Program Project; CSL: Consortium on Safe Labor.

Model I - Adjusted for age

Model II - Adjusted for Model I + maternal race, parity, preeclampsia

BMI was defined as: underweight ( $\text{BMI} < 18.5 \text{ kg}/\text{m}^2$ ); normal ( $18.5 \text{ kg}/\text{m}^2 \leq \text{BMI} < 25.0 \text{ kg}/\text{m}^2$ ); overweight ( $25.0 \text{ kg}/\text{m}^2 \leq \text{BMI} < 30.0 \text{ kg}/\text{m}^2$ ); obese ( $\text{BMI} \geq 30.0 \text{ kg}/\text{m}^2$ ).

Insufficient LGA infants of overweight/obese women who remained within IOM guidelines to make LGA OR determination

1  
2  
3 After adjusting for other risk factors, the combined effect of overweight and exceeding IOM  
4 guidelines remained, with an increase in odds of LGA [OR 2.25, 95%CI (1.18, 4.28), p=0.01]  
5 compared to the reference group. The increased odds for LGA in normal weight women who  
6 exceed IOM guidelines was slightly attenuated [OR 1.83 95%CI (0.99, 3.40), p=0.06]. Similar  
7 results were shown for overweight/obese women in the PPG who exceeded IOM guidelines.  
8  
9 There was an increase in odds of LGA for these women in both models adjusted for age only  
10 [OR 2.04 95%CI (1.05, 3.97), p=0.03] and fully adjusted models [OR 2.12 95%CI (1.11, 4.04),  
11 p=0.02] compared with normal weight women who remain within IOM guidelines.  
12  
13  
14  
15  
16  
17  
18  
19  
20

## 21 **DISCUSSION**

22  
23 Although delivery of LGA infants in the TIDM population has been examined in several  
24 epidemiological studies, few studies have examined LGA prevalence over time. In this analysis  
25 of GWG, pre-pregnancy BMI and LGA infant births among mothers with TIDM, we identified  
26 several important overall and GWG- and BMI-specific patterns. Our results suggest no change  
27 in overall LGA prevalence over a 30-year period. However, the proportion of infants born LGA  
28 to women of normal weight who adhered to GWG guidelines was reduced by 17%. This  
29 reduction appeared to be offset by a 15.0% increase in LGA prevalence among  
30 overweight/obese women who exceeded IOM guidelines.  
31  
32  
33  
34  
35  
36  
37  
38  
39  
40

41 Persson et al, 2009 showed that in a contemporary population of women with TIDM,  
42 obstetric and perinatal complications, particularly higher birthweight, remain markedly higher  
43 than the general population<sup>6</sup>. Similarly, the results of our study demonstrate that high weight for  
44 gestational age remains a frequent outcome in pregnancies complicated by TIDM, despite  
45 advancements throughout the years in glucose management and insulin treatment and delivery.  
46  
47 Overall, our study showed LGA prevalence, for both groups, was markedly higher than the  
48 general population, despite observing reductions within select BMI subgroups.  
49  
50  
51  
52  
53  
54  
55  
56  
57  
58  
59  
60

1  
2  
3 Historically, obesity has been associated with T1DM. However, the T1DM population  
4  
5 has shown a significant increase in women entering pregnancy as overweight and obese.  
6  
7 There was a marked increase in the proportion of overweight/obese women in the CSL  
8  
9 compared to the PPG (51.4% vs 20.7%). Women in the CSL belonging to the overweight/obese  
10  
11 subgroup accounted for a greater proportion of those who exceeded IOM guidelines (58.7%)  
12  
13 compared with women in the PPG (41.1%). Overweight/obese women who exceeded IOM  
14  
15 guidelines showed a 15.0% ( $p=0.01$ ) increase in LGA over time. Our results confirm previous  
16  
17 studies that have linked maternal overweight<sup>19 29</sup>, GWG<sup>34</sup> and adverse birth outcomes in the  
18  
19 T1DM population. Despite the improvement, this subgroup remains at the highest risk of  
20  
21 delivering an LGA infant compared to normal weight women who adhered to IOM guidelines.  
22  
23 Interestingly, despite a lower average GWG for women with higher BMI in the CSL compared to  
24  
25 women in the PPG, women with overweight and obesity remained in excess of IOM guidelines  
26  
27 for GWG. On average, overweight and obese CSL women gained 2.6 kg less and 0.30 kg  
28  
29 more, respectively, over total gestation than overweight and obese women in the PPG. These  
30  
31 results suggest that women in the PPG with higher BMI far exceeded IOM guidelines. The  
32  
33 reduction in average GWG for overweight and obese women could help explain the lowered  
34  
35 LGA prevalence over time in this subgroup, 41.2% in the CSL compared to 51.7% in the PPG.  
36  
37 Previous studies in the literature have shown the effect of excessive GWG on risk of LGA,  
38  
39 independent of BMI<sup>14-16 35</sup>. However, the results of our study did not show BMI and adherence  
40  
41 to IOM guidelines as independent predictors of LGA. Women who were not only overweight (or  
42  
43 obese for PPG) but who also exceeded GWG guidelines were at a greater than 2-fold increase  
44  
45 risk of delivering an LGA infant (CSL: OR 2.25 (1.18, 4.28), PPG: OR 2.12 (1.11, 4.04)),  
46  
47 compared with women who were normal weight and with GWG within IOM guidelines.  
48  
49

50  
51 This study has several limitations. Our analysis was unable to include a comparison of  
52  
53 glucose control between groups as this data was not available for CSL participants. Although  
54  
55 Secher et. al. showed higher GWG was associated with LGA outcomes, independent of glucose  
56  
57

1  
2  
3 control<sup>15</sup>, these measurements could potentially account for the reduction in LGA prevalence  
4 among normal weight women who adhered to IOM guidelines in our study. Second, our study  
5 compared women with T1DM from a local population to women in a nationally representative  
6 population. The differences between the populations, which include regional differences in diet,  
7 methods of treatment, racial composition and geography limit the generalizability of our results.  
8 However, this study serves as an important start for assessing impact of policy changes on  
9 perinatal outcomes like LGA over time. Our sample size for overweight and obese women who  
10 remain within IOM guidelines for PPG limited our power to robustly test effect modification, and  
11 thus no comparisons across time could be made between groups. However, we were able to  
12 examine the role of pre-pregnancy BMI as an effect modifier in the contemporary CSL cohort.  
13 Lastly, despite the importance of nephropathy and retinopathy as indicators of diabetes severity,  
14 potentially affecting glucose transport, differing definitions between cohorts prevented variable  
15 harmonization and, therefore, inclusion in our study. Prevalence of nephropathy according to  
16 each group's definition was 18.9% for PPG and 7.8% for CSL.  
17  
18  
19  
20  
21  
22  
23  
24  
25  
26  
27  
28  
29  
30  
31

32  
33 Despite these limitations, important strengths exist and this study extends beyond prior  
34 studies in several important areas. Our study compared two cohorts of women across a time  
35 period wherein major advancements have been made in the treatment of T1DM while  
36 simultaneously obesity has become a prevalent chronic disease— representing opposing risks  
37 for LGA. Each data set is comprehensive and has unique strengths. For instance, the PPG  
38 cohort includes frequent, repeated observations of women during pregnancy, while the CSL is  
39 large and contemporary.  
40  
41  
42  
43  
44  
45  
46

47  
48 In conclusion, while overall LGA prevalence has remained relatively unchanged over  
49 time, normal weight women with T1DM who adhere to IOM guidelines have experienced a  
50 reduction in LGA prevalence. Women in a more recent T1DM population are starting the  
51 pregnancy period with significantly higher proportions of overweight and obesity than in previous  
52 years. Entering pregnancy as overweight while exceeding IOM guidelines for GWG places  
53  
54  
55  
56  
57

1  
2  
3 women in this population at the highest risk of LGA. This study demonstrates the importance of  
4 strict adherence to IOM guidelines for GWG, particularly for women who enter pregnancy as  
5 overweight, in order to address reduction of LGA rates in the TIDM population.  
6  
7  
8  
9  
10  
11  
12  
13  
14  
15  
16  
17  
18  
19  
20  
21  
22  
23  
24  
25  
26  
27  
28  
29  
30  
31  
32  
33  
34  
35  
36  
37  
38  
39  
40  
41  
42  
43  
44  
45  
46  
47  
48  
49  
50  
51  
52  
53  
54  
55  
56  
57  
58  
59  
60

For peer review only

### Contributors

Study concept and design: KLM, JCK; acquisition of data: KLM, JCK; statistical analysis: KLM; interpretation of data: KLM, JCK, KB, CLJ, RD, LMD; drafting of the manuscript: KLM; critical revision of the manuscript for important intellectual content: KLM, JCK, KB, CLJ; administrative, technical, and material support: KLM, JCK. All authors approved of the version of the manuscript to be published.

**Funding:** This work was supported, in part, by the University of Cincinnati, Molecular Epidemiology in Children's Environmental Health Training Grant [T32-ES10957], NIH grant Diabetes in Pregnancy Program Project Grant [HD11725], the Consortium on Safe Labor was funded by the *Eunice Kennedy Shriver* Intramural Research Program of the NICHD [Contract No. HHSN267200603425C] and the Intramural Research Training Program of the National Institute for Environmental Health Sciences [ES16003]. This work was also funded, in part, by the Intramural Program at the NIH, National Institute of Environmental Health Sciences [Z1AES103325-01].

**Competing interests** None declared.

**Patient consent** Yes.

**Ethics approval** IRB approval was obtained from Cincinnati Children's Hospital Medical center as well as the University of Cincinnati prior to the secondary analysis of the Diabetes in Pregnancy Program Project (PPG) and the Consortium on Safe Labor (CLS) data.

**Data sharing statement** No additional data are available.

**REFERENCES**

1. Evers IM, de Valk HW, Mol BW, et al. Macrosomia despite good glycaemic control in Type I diabetic pregnancy; results of a nationwide study in The Netherlands. *Diabetologia* 2002;45(11):1484-9. doi: 10.1007/s00125-002-0958-7 [published Online First: 2002/11/19].
2. Catalano PM, Hauguel-De Mouzon S. Is it time to revisit the Pedersen hypothesis in the face of the obesity epidemic? *Am J Obstet Gynecol* 2011;204(6):479-87. doi: 10.1016/j.ajog.2010.11.039
3. Persson B, Hanson U. Fetal size at birth in relation to quality of blood glucose control in pregnancies complicated by pregestational diabetes mellitus. *Br J Obstet Gynaecol* 1996;103(5):427-33. [published Online First: 1996/05/01].
4. Kerksen A, de Valk HW, Visser GH. Increased second trimester maternal glucose levels are related to extremely large-for-gestational-age infants in women with type 1 diabetes. *Diabetes Care* 2007;30(5):1069-74. doi: 10.2337/dc05-1985 [published Online First: 2007/05/01].
5. Scifres CM, Feghali MN, Althouse AD, et al. Effect of excess gestational weight gain on pregnancy outcomes in women with type 1 diabetes. *Obstet Gynecol* 2014;123(6):1295-302. doi: 10.1097/aog.0000000000000271 [published Online First: 2014/05/09].
6. Persson M, Norman M, Hanson U. Obstetric and perinatal outcomes in type 1 diabetic pregnancies: A large, population-based study. *Diabetes Care* 2009;32(11):2005-9. doi: 10.2337/dc09-0656 [published Online First: 2009/08/14].
7. Kim SY, Kotelchuck M, Wilson HG, et al. Prevalence of Adverse Pregnancy Outcomes, by Maternal Diabetes Status at First and Second Deliveries, Massachusetts, 1998-2007. *Prev Chronic Dis* 2015;12:E218. doi: 10.5888/pcd12.150362 [published Online First: 2015/12/15].
8. Sjaarda LA, Albert PS, Mumford SL, et al. Customized large-for-gestational-age birthweight at term and the association with adverse perinatal outcomes. *Am J Obstet Gynecol*

- 2014;210(1):63.e1-63.e11. doi: 10.1016/j.ajog.2013.09.006 [published Online First: 2013/09/17].
9. Stotland NE, Caughey AB, Breed EM, et al. Risk factors and obstetric complications associated with macrosomia. *Int J Gynaecol Obstet* 2004;87(3):220-6. doi: 10.1016/j.ijgo.2004.08.010 [published Online First: 2004/11/19].
10. Surkan PJ, Hsieh CC, Johansson AL, et al. Reasons for increasing trends in large for gestational age births. *Obstet Gynecol* 2004;104(4):720-6. doi: 10.1097/01.AOG.0000141442.59573.cd [published Online First: 2004/10/02].
11. Cundy T, Gamble G, Manuel A, et al. Determinants of birth-weight in women with established and gestational diabetes. *Aust N Z J Obstet Gynaecol* 1993;33(3):249-54. [published Online First: 1993/08/01].
12. Wilcox MA, Chang AM, Johnson IR. The effects of parity on birthweight using successive pregnancies. *Acta Obstet Gynecol Scand* 1996;75(5):459-3. [published Online First: 1996/05/01].
13. Heerwagen MJ, Miller MR, Barbour LA, et al. Maternal obesity and fetal metabolic programming: a fertile epigenetic soil. *Am J Physiol Regul Integr Comp Physiol* 2010;299(3):R711-22. doi: 10.1152/ajpregu.00310.2010 [published Online First: 2010/07/16].
14. Starling AP, Brinton JT, Glueck DH, et al. Associations of maternal BMI and gestational weight gain with neonatal adiposity in the Healthy Start study. *Am J Clin Nutr* 2015 doi: 10.3945/ajcn.114.094946
15. Secher AL, Parellada CB, Ringholm L, et al. Higher gestational weight gain is associated with increasing offspring birth weight independent of maternal glycemic control in women with type 1 diabetes. *Diabetes Care* 2014;37(10):2677-84. doi: 10.2337/dc14-0896 [published Online First: 2014/09/25].



16. Kim SY, Sharma AJ, Sappenfield W, et al. Preventing large birth size in women with preexisting diabetes mellitus: The benefit of appropriate gestational weight gain. *Prev Med* 2016;91:164-68. doi: 10.1016/j.ypmed.2016.08.026 [published Online First: 2016/08/20].
17. Ehrenberg HM, Mercer BM, Catalano PM. The influence of obesity and diabetes on the prevalence of macrosomia. *Am J Obstet Gynecol* 2004;191(3):964-8. doi: 10.1016/j.ajog.2004.05.052 [published Online First: 2004/10/07].
18. Sacks DA, Liu AI, Wolde-Tsadik G, et al. What proportion of birth weight is attributable to maternal glucose among infants of diabetic women? *Am J Obstet Gynecol* 2006;194(2):501-7. doi: 10.1016/j.ajog.2005.07.042 [published Online First: 2006/02/07].
19. Morrens A, Verhaeghe J, Vanhole C, et al. Risk factors for large-for-gestational age infants in pregnant women with type 1 diabetes. *BMC Pregnancy Childbirth* 2016;16(1):162. doi: 10.1186/s12884-016-0958-0 [published Online First: 2016/07/17].
20. Hill DJ, Prapavessis H, Shoemaker JK, et al. Relationship between Birth Weight and Metabolic Status in Obese Adolescents. *ISRN Obesity* 2013;2013:8. doi: 10.1155/2013/490923
21. Schellong K, Schulz S, Harder T, et al. Birth weight and long-term overweight risk: systematic review and a meta-analysis including 643,902 persons from 66 studies and 26 countries globally. *PLoS One* 2012;7(10):e47776. doi: 10.1371/journal.pone.0047776 [published Online First: 2012/10/20].
22. Hediger ML, Overpeck MD, McGlynn A, et al. Growth and fatness at three to six years of age of children born small- or large-for-gestational age. *Pediatrics* 1999;104(3):e33. [published Online First: 1999/09/02].
23. Zhang Z, Kris-Etherton PM, Hartman TJ. Birth weight and risk factors for cardiovascular disease and type 2 diabetes in US children and adolescents: 10 year results from NHANES. *Matern Child Health J* 2014;18(6):1423-32. doi: 10.1007/s10995-013-1382-y [published Online First: 2013/11/19].

- 1  
2  
3 24. Boney CM, Verma A, Tucker R, et al. Metabolic syndrome in childhood: association with  
4 birth weight, maternal obesity, and gestational diabetes mellitus. *Pediatrics*  
5 2005;115(3):e290-6. doi: 10.1542/peds.2004-1808 [published Online First: 2005/03/03].  
6  
7  
8  
9 25. Branum AM, Kirmeyer SE, Gregory EC. Pre-pregnancy Body Mass Index by Maternal  
10 Characteristics and State: Data From the Birth Certificate, 2014. *Natl Vital Stat Rep*  
11 2016;65(6):1-11. [published Online First: 2016/08/11].  
12  
13  
14  
15 26. Chu SY, Callaghan WM, Bish CL, et al. Gestational weight gain by body mass index among  
16 US women delivering live births, 2004-2005: fueling future obesity. *Am J Obstet Gynecol*  
17 2009;200(3):271.e1-7. doi: 10.1016/j.ajog.2008.09.879 [published Online First: 2009/01/13].  
18  
19  
20  
21 27. Mamun AA, O'Callaghan M, Callaway L, et al. Associations of gestational weight gain with  
22 offspring body mass index and blood pressure at 21 years of age: evidence from a birth  
23 cohort study. *Circulation* 2009;119(13):1720-7. doi: 10.1161/circulationaha.108.813436  
24  
25  
26  
27 [published Online First: 2009/03/25].  
28  
29  
30 28. Institute of M, National Research Council Committee to Reexamine IOMPWG. The National  
31 Academies Collection: Reports funded by National Institutes of Health. In: Rasmussen KM,  
32 Yaktine AL, eds. *Weight Gain During Pregnancy: Reexamining the Guidelines*. Washington  
33 (DC): National Academies Press (US) National Academy of Sciences. 2009.  
34  
35  
36  
37 29. Persson M, Pasupathy D, Hanson U, et al. Pre-pregnancy body mass index and the risk of  
38 adverse outcome in type 1 diabetic pregnancies: a population-based cohort study. *BMJ*  
39 *Open* 2012;2(1) doi: 10.1136/bmjopen-2011-000601  
40  
41  
42  
43 30. Rosenberg TJ, Garbers S, Lipkind H, et al. Maternal obesity and diabetes as risk factors for  
44 adverse pregnancy outcomes: differences among 4 racial/ethnic groups. *Am J Public Health*  
45 2005;95(9):1545-51. doi: 10.2105/ajph.2005.065680 [published Online First: 2005/08/25].  
46  
47  
48  
49 31. Miodovnik M, Mimouni F, Dignan PS, et al. Major malformations in infants of IDDM women.  
50 Vasculopathy and early first-trimester poor glycemic control. *Diabetes Care* 1988;11(9):713-  
51 8. [published Online First: 1988/10/01].  
52  
53  
54  
55  
56  
57

- 1  
2  
3 32. Zhang J, Troendle J, Reddy UM, et al. Contemporary cesarean delivery practice in the  
4 United States. *Am J Obstet Gynecol* 2010;203(4):326.e1-26.e10. doi:  
5 10.1016/j.ajog.2010.06.058 [published Online First: 2010/08/17].  
6  
7  
8  
9 33. Lubchenco LO, Hansman C, Dressler M, et al. Intrauterine Growth as Estimated from  
10 Liveborn Birth-Weight Data at 24 to 42 Weeks of Gestation. *Pediatrics* 1963;32:793-800.  
11 [published Online First: 1963/11/01].  
12  
13  
14  
15 34. Egan AM, Dennedy MC, Al-Ramli W, et al. ATLANTIC-DIP: excessive gestational weight  
16 gain and pregnancy outcomes in women with gestational or pregestational diabetes mellitus.  
17  
18  
19  
20  
21  
22  
23  
24  
25 35. Nohr EA, Vaeth M, Baker JL, et al. Combined associations of pre-pregnancy body mass  
26 index and gestational weight gain with the outcome of pregnancy. *Am J Clin Nutr*  
27  
28  
29  
30  
31  
32  
33  
34  
35  
36  
37  
38  
39  
40  
41  
42  
43  
44  
45  
46  
47  
48  
49  
50  
51  
52  
53  
54  
55  
56  
57  
58  
59  
60

Table S1. Maternal characteristics of women in PPG (1978-1993) and CSL (2002-2008) by adherence to IOM recommendations for gestational weight gain

| Characteristic                                                   | PPG<br>n=333                      |                     |                   | p-value          | CSL<br>n=358      |                    |                   | p-value          |
|------------------------------------------------------------------|-----------------------------------|---------------------|-------------------|------------------|-------------------|--------------------|-------------------|------------------|
|                                                                  | n=74<br>IOM<br>under <sup>1</sup> | n=118<br>IOM within | n=141<br>IOM over |                  | n=62<br>IOM under | n=95<br>IOM within | n=201<br>IOM over |                  |
| Maternal age (at delivery), years                                | 25.6 ± 5.2                        | 26.7 ± 4.8          | 26.5 ± 5.1        | 0.33             | 28.2 ± 6.0        | 27.7 ± 5.9         | 27.3±6.1          | 0.53             |
| Married, yes <sup>a</sup>                                        | 41 (22.1)                         | 89 (77.4)           | 94 (69.1)         | <b>0.02</b>      | 39 (62.9)         | 56 (59.0)          | 122 (60.7)        | 0.88             |
| Race                                                             |                                   |                     |                   | 0.15             |                   |                    |                   | <b>0.02</b>      |
| White                                                            | 56 (75.7)                         | 103 (87.3)          | 123 (87.2)        |                  | 30 (48.4)         | 57 (60.0)          | 138 (68.7)        |                  |
| Black                                                            | 17 (23.0)                         | 13 (11.0)           | 17 (12.1)         |                  | 20 (32.3)         | 18 (19.0)          | 31 (15.4)         |                  |
| Other                                                            | 1 (1.3)                           | 2 (1.7)             | 1 (0.7)           |                  | 12 (19.3)         | 20 (21.1)          | 32 (15.9)         |                  |
| Nulliparous, yes                                                 | 43 (58.1)                         | 59 (50.0)           | 64 (45.4)         | 0.21             | 26 (41.9)         | 50 (52.6)          | 107 (53.2)        | 0.28             |
| Pre-pregnancy BMI (kg/m <sup>2</sup> )                           | 21.9 ± 2.9                        | 22.0 ± 2.7          | 24.4 ± 3.6        | <b>&lt;.0001</b> | 27.2 ± 7.2        | 26.3 ± 6.6         | 27.0 ± 5.7        | 0.62             |
| Pre-pregnancy BMI category                                       |                                   |                     |                   | <b>&lt;.0001</b> |                   |                    |                   | <b>0.007</b>     |
| Underweight (BMI<18.5 kg/m <sup>2</sup> )                        | 4 (5.4)                           | 7 (5.9)             | 0 (0.0)           |                  | 2 (3.2)           | 3 (3.2)            | 1 (0.5)           |                  |
| Normal (18.5 kg/m <sup>2</sup> ≤BMI<25.0 kg/m <sup>2</sup> )     | 67 (90.5)                         | 103 (87.3)          | 83 (58.9)         |                  | 33 (53.2)         | 53 (55.8)          | 82 (48.8)         |                  |
| Overweight (25.0 kg/m <sup>2</sup> ≤BMI<30.0 kg/m <sup>2</sup> ) | 1 (1.4)                           | 7 (5.9)             | 48 (34.0)         |                  | 12 (19.4)         | 15 (15.8)          | 70 (34.8)         |                  |
| Obese (BMI≥30.0 kg/m <sup>2</sup> )                              | 2 (2.7)                           | 1 (0.9)             | 10 (7.1)          |                  | 15 (24.2)         | 24 (25.3)          | 48 (23.9)         |                  |
| Pre-pregnancy Overweight/Obese (BMI≥25.0 kg/m <sup>2</sup> )     | 3 (4.1)                           | 8 (6.8)             | 58 (41.1)         | <b>&lt;.0001</b> | 27 (43.6)         | 39 (41.1)          | 118 (58.7)        | <b>0.007</b>     |
| Gestational Weight Gain (kg)                                     | 7.2 ± 3.9                         | 13.4 ± 1.8          | 18.9 ± 4.0        | <b>&lt;.0001</b> | 4.9 ± 5.3         | 11.6 ± 3.0         | 18.8 ± 5.7        | <b>&lt;.0001</b> |
| Preeclampsia, yes                                                | 13 (17.6)                         | 17 (14.4)           | 20 (14.2)         | 0.78             | 10 (16.1)         | 9 (9.5)            | 36 (17.9)         | 0.17             |
| Previous cesarean section, yes <sup>a</sup>                      | 16 (21.9)                         | 40 (33.9)           | 49 (34.8)         | 0.13             | 15 (25.9)         | 22 (25.3)          | 49 (25.4)         | 1.00             |
| Cesarean section, yes                                            | 50 (67.6)                         | 84 (71.2)           | 99 (70.2)         | 0.86             | 37 (59.7)         | 59 (62.1)          | 143 (71.1)        | 0.13             |
| Large-for-gestational age                                        | 22 (29.7)                         | 44 (37.3)           | 68 (48.2)         | <b>0.02</b>      | 15 (24.2)         | 30 (31.6)          | 86 (42.8)         | <b>0.01</b>      |

Mean ± SD are shown for all continuous variables and n(%) are shown for categorical variables

LGA was defined as infants with a birthweight >90th percentile, adjusted for age, sex and race.

<sup>a</sup> PPG: Marital status missing for 11 women; CSL: Previous cesarean section missing for 20 women.

Table S2. Mean ± SD of reproductive characteristics for PPG (1978-1993) and CSL (2002-2008) stratified by BMI

| n                                | PPG<br>n=333 |             |             |            | CSL<br>n=358 |            |            |            |
|----------------------------------|--------------|-------------|-------------|------------|--------------|------------|------------|------------|
|                                  | 11           | 253         | 56          | 13         | 6            | 168        | 97         | 87         |
|                                  | Underweight  | Normal      | Overweight  | Obese      | Underweight  | Normal     | Overweight | Obese      |
| Maternal age at delivery (years) | 24.4 ± 5.2   | 26.5 ± 4.8  | 25.9 ± 5.9  | 29.3 ± 4.9 | 28.8 ± 4.1   | 27.4 ± 5.9 | 26.6 ± 6.3 | 28.8 ± 5.8 |
| Birthweight (g)                  | 2994 ± 945   | 3269 ± 796  | 3390 ± 767  | 3293 ± 903 | 2942 ± 666   | 3264 ± 796 | 3277 ± 823 | 3149 ± 910 |
| Gestational age (weeks)          | 35.7 ± 3.7   | 36.9 ± 2.47 | 37.4 ± 2.17 | 37.4 ± 1.5 | 35.7 ± 5.4   | 36.3 ± 2.6 | 36.0 ± 2.3 | 36.0 ± 3.1 |
| Gestational Weight Gain (kg)     | 11.5 ± 5.0   | 14.0 ± 5.5  | 17.1 ± 5.4  | 10.7 ± 5.4 | 11.3 ± 8.6   | 16.4 ± 6.4 | 14.5 ± 6.7 | 11.0 ± 8.5 |
| Prepregnancy BMI                 | 17.3 ± 0.7   | 21.9 ± 1.6  | 26.6 ± 1.35 | 33.6 ± 3.7 | 17.5 ± 1.0   | 23.4 ± 1.7 | 27.2 ± 1.5 | 35.8 ± 5.3 |

Mean ± SD are shown for all continuous variables

BMI=body mass index (kg/m<sup>2</sup>); PPG=Diabetes in Pregnancy Program Project; CSL=Consortium on Safe Labor.

BMI was defined as: underweight (BMI<18.5 kg/m<sup>2</sup>); normal (18.5 kg/m<sup>2</sup>≤BMI<25.0 kg/m<sup>2</sup>); overweight (25.0 kg/m<sup>2</sup>≤BMI<30.0 kg/m<sup>2</sup>); obese (BMI≥30.0 kg/m<sup>2</sup>).

## STROBE Statement—checklist of items that should be included in reports of observational studies

|                           | Item No | Recommendation                                                                                                                                                                                                                                                                                                                                                                                                                                                                                                                                                                                                                                                                                                                        |
|---------------------------|---------|---------------------------------------------------------------------------------------------------------------------------------------------------------------------------------------------------------------------------------------------------------------------------------------------------------------------------------------------------------------------------------------------------------------------------------------------------------------------------------------------------------------------------------------------------------------------------------------------------------------------------------------------------------------------------------------------------------------------------------------|
| <b>Title and abstract</b> | 1       | (a) Indicate the study's design with a commonly used term in the title or the abstract [ <b>Within the title page 1 and design section of the abstract page 2</b> ]<br>(b) Provide in the abstract an informative and balanced summary of what was done and what was found [ <b>Results section of abstract page 2</b> ]                                                                                                                                                                                                                                                                                                                                                                                                              |
| <b>Introduction</b>       |         |                                                                                                                                                                                                                                                                                                                                                                                                                                                                                                                                                                                                                                                                                                                                       |
| Background/rationale      | 2       | Explain the scientific background and rationale for the investigation being reported [ <b>page 5</b> ]                                                                                                                                                                                                                                                                                                                                                                                                                                                                                                                                                                                                                                |
| Objectives                | 3       | State specific objectives, including any prespecified hypotheses [ <b>page 6</b> ]                                                                                                                                                                                                                                                                                                                                                                                                                                                                                                                                                                                                                                                    |
| <b>Methods</b>            |         |                                                                                                                                                                                                                                                                                                                                                                                                                                                                                                                                                                                                                                                                                                                                       |
| Study design              | 4       | Present key elements of study design early in the paper [ <b>Methods pages 6-7</b> ]                                                                                                                                                                                                                                                                                                                                                                                                                                                                                                                                                                                                                                                  |
| Setting                   | 5       | Describe the setting, locations, and relevant dates, including periods of recruitment, exposure, follow-up, and data collection [ <b>Methods pages 6-7</b> ]                                                                                                                                                                                                                                                                                                                                                                                                                                                                                                                                                                          |
| Participants              | 6       | (a) <i>Cohort study</i> —Give the eligibility criteria, and the sources and methods of selection of participants. Describe methods of follow-up [ ]<br><i>Case-control study</i> —Give the eligibility criteria, and the sources and methods of case ascertainment and control selection. Give the rationale for the choice of cases and controls [ ]<br><i>Cross-sectional study</i> —Give the eligibility criteria, and the sources and methods of selection of participants [ <b>pages 6-7</b> ]<br>(b) <i>Cohort study</i> —For matched studies, give matching criteria and number of exposed and unexposed [ ]<br><i>Case-control study</i> —For matched studies, give matching criteria and the number of controls per case [ ] |
| Variables                 | 7       | Clearly define all outcomes, exposures, predictors, potential confounders, and effect modifiers. Give diagnostic criteria, if applicable [ <b>pages 8-9</b> ]                                                                                                                                                                                                                                                                                                                                                                                                                                                                                                                                                                         |
| Data sources/ measurement | 8*      | For each variable of interest, give sources of data and details of methods of assessment (measurement). Describe comparability of assessment methods if there is more than one group [ <b>pages 8-9</b> ]                                                                                                                                                                                                                                                                                                                                                                                                                                                                                                                             |
| Bias                      | 9       | Describe any efforts to address potential sources of bias [ <b>page 8</b> ]                                                                                                                                                                                                                                                                                                                                                                                                                                                                                                                                                                                                                                                           |
| Study size                | 10      | Explain how the study size was arrived at [ <b>pages 6-7</b> ]                                                                                                                                                                                                                                                                                                                                                                                                                                                                                                                                                                                                                                                                        |
| Quantitative variables    | 11      | Explain how quantitative variables were handled in the analyses. If applicable, describe which groupings were chosen and why [ <b>pages 8-9</b> ]                                                                                                                                                                                                                                                                                                                                                                                                                                                                                                                                                                                     |
| Statistical methods       | 12      | (a) Describe all statistical methods, including those used to control for confounding [ <b>pages 8-10</b> ]<br>(b) Describe any methods used to examine subgroups and interactions [ <b>page 9</b> ]<br>(c) Explain how missing data were addressed [ <b>N/A</b> ]<br>(d) <i>Cohort study</i> —If applicable, explain how loss to follow-up was addressed [ ]<br><i>Case-control study</i> —If applicable, explain how matching of cases and controls was addressed [ ]                                                                                                                                                                                                                                                               |

|                          |     |                                                                                                                                                                                                                                                                                                                                                                                                                                     |
|--------------------------|-----|-------------------------------------------------------------------------------------------------------------------------------------------------------------------------------------------------------------------------------------------------------------------------------------------------------------------------------------------------------------------------------------------------------------------------------------|
|                          |     | <i>Cross-sectional study</i> —If applicable, describe analytical methods taking account of sampling strategy [N/A]                                                                                                                                                                                                                                                                                                                  |
|                          |     | (e) Describe any sensitivity analyses [N/A]                                                                                                                                                                                                                                                                                                                                                                                         |
| <b>Results</b>           |     |                                                                                                                                                                                                                                                                                                                                                                                                                                     |
| Participants             | 13* | (a) Report numbers of individuals at each stage of study—eg numbers potentially eligible, examined for eligibility, confirmed eligible, included in the study, completing follow-up, and analysed [page 11 table 1]<br>(b) Give reasons for non-participation at each stage [N/A]<br>(c) Consider use of a flow diagram [N/A]                                                                                                       |
| Descriptive data         | 14* | (a) Give characteristics of study participants (eg demographic, clinical, social) and information on exposures and potential confounders [pages 10-11 and table 1]<br>(b) Indicate number of participants with missing data for each variable of interest [table 1]<br>(c) <i>Cohort study</i> —Summarise follow-up time (eg, average and total amount) [ ]                                                                         |
| Outcome data             | 15* | <i>Cohort study</i> —Report numbers of outcome events or summary measures over time [ ]<br><i>Case-control study</i> —Report numbers in each exposure category, or summary measures of exposure [ ]<br><i>Cross-sectional study</i> —Report numbers of outcome events or summary measures [tables 2 and 3]                                                                                                                          |
| Main results             | 16  | (a) Give unadjusted estimates and, if applicable, confounder-adjusted estimates and their precision (eg, 95% confidence interval). Make clear which confounders were adjusted for and why they were included [table 4]<br>(b) Report category boundaries when continuous variables were categorized [N/A]<br>(c) If relevant, consider translating estimates of relative risk into absolute risk for a meaningful time period [N/A] |
| Other analyses           | 17  | Report other analyses done—eg analyses of subgroups and interactions, and sensitivity analyses [table 5]                                                                                                                                                                                                                                                                                                                            |
| <b>Discussion</b>        |     |                                                                                                                                                                                                                                                                                                                                                                                                                                     |
| Key results              | 18  | Summarise key results with reference to study objectives [page 16]                                                                                                                                                                                                                                                                                                                                                                  |
| Limitations              | 19  | Discuss limitations of the study, taking into account sources of potential bias or imprecision. Discuss both direction and magnitude of any potential bias [pages 17-18]                                                                                                                                                                                                                                                            |
| Interpretation           | 20  | Give a cautious overall interpretation of results considering objectives, limitations, multiplicity of analyses, results from similar studies, and other relevant evidence [pages 18-19]                                                                                                                                                                                                                                            |
| Generalisability         | 21  | Discuss the generalisability (external validity) of the study results [page 18]                                                                                                                                                                                                                                                                                                                                                     |
| <b>Other information</b> |     |                                                                                                                                                                                                                                                                                                                                                                                                                                     |
| Funding                  | 22  | Give the source of funding and the role of the funders for the present study and, if applicable, for the original study on which the present article is based [page 20]                                                                                                                                                                                                                                                             |

1  
2 \*Give information separately for cases and controls in case-control studies and, if applicable, for exposed and  
3 unexposed groups in cohort and cross-sectional studies.  
4

5 **Note:** An Explanation and Elaboration article discusses each checklist item and gives methodological background and  
6 published examples of transparent reporting. The STROBE checklist is best used in conjunction with this article (freely  
7 available on the Web sites of PLoS Medicine at <http://www.plosmedicine.org/>, Annals of Internal Medicine at  
8 <http://www.annals.org/>, and Epidemiology at <http://www.epidem.com/>). Information on the STROBE Initiative is  
9 available at [www.strobe-statement.org](http://www.strobe-statement.org).  
10  
11  
12  
13  
14  
15  
16  
17  
18  
19  
20  
21  
22  
23  
24  
25  
26  
27  
28  
29  
30  
31  
32  
33  
34  
35  
36  
37  
38  
39  
40  
41  
42  
43  
44  
45  
46  
47  
48  
49  
50  
51  
52  
53  
54  
55  
56  
57  
58  
59  
60



# BMJ Open

## The impact of gestational weight gain and pre-pregnancy body mass index on the prevalence of large-for-gestational age infants in two cohorts of women with Type I Insulin-Dependent Diabetes: A cross-sectional population study

|                                 |                                                                                                                                                                                                                                                                                                                                                                                                                                                                                                                                                                                                                                                                                                                     |
|---------------------------------|---------------------------------------------------------------------------------------------------------------------------------------------------------------------------------------------------------------------------------------------------------------------------------------------------------------------------------------------------------------------------------------------------------------------------------------------------------------------------------------------------------------------------------------------------------------------------------------------------------------------------------------------------------------------------------------------------------------------|
| Journal:                        | <i>BMJ Open</i>                                                                                                                                                                                                                                                                                                                                                                                                                                                                                                                                                                                                                                                                                                     |
| Manuscript ID                   | bmjopen-2017-019617.R1                                                                                                                                                                                                                                                                                                                                                                                                                                                                                                                                                                                                                                                                                              |
| Article Type:                   | Research                                                                                                                                                                                                                                                                                                                                                                                                                                                                                                                                                                                                                                                                                                            |
| Date Submitted by the Author:   | 17-Jan-2018                                                                                                                                                                                                                                                                                                                                                                                                                                                                                                                                                                                                                                                                                                         |
| Complete List of Authors:       | McWhorter, Kettrell; National Institute of Environmental Health Sciences, Epidemiology and Biostatistics; University of Cincinnati School of Medicine, Department of Environmental Health<br>Bowers, K; Cincinnati Children's Hospital Medical Center, Division of Biostatistics and Epidemiology<br>Dolan, Lawrence; Cincinnati Children's Hospital Medical Center, Division of Endocrinology<br>Deka, Ranjan; University of Cincinnati School of Medicine, Department of Environmental Health<br>Jackson, Chandra; National Institute of Environmental Health Sciences, Epidemiology and Biostatistics<br>Khoury, Jane; Cincinnati Children's Hospital Medical Center, Division of Biostatistics and Epidemiology |
| <b>Primary Subject Heading</b>: | Epidemiology                                                                                                                                                                                                                                                                                                                                                                                                                                                                                                                                                                                                                                                                                                        |
| Secondary Subject Heading:      | Diabetes and endocrinology, Obstetrics and gynaecology, Reproductive medicine, Public health                                                                                                                                                                                                                                                                                                                                                                                                                                                                                                                                                                                                                        |
| Keywords:                       | Diabetes in pregnancy < DIABETES & ENDOCRINOLOGY, PERINATOLOGY, Maternal medicine < OBSTETRICS                                                                                                                                                                                                                                                                                                                                                                                                                                                                                                                                                                                                                      |
|                                 |                                                                                                                                                                                                                                                                                                                                                                                                                                                                                                                                                                                                                                                                                                                     |

SCHOLARONE™  
Manuscripts

1  
2  
3 **The impact of gestational weight gain and pre-pregnancy body mass index on the**  
4 **prevalence of large-for-gestational age infants in two cohorts of women with Type**  
5 **I Insulin-Dependent Diabetes: A cross-sectional population study**  
6

7 Ketrell L. McWhorter, PhD, MBA <sup>1,2,3</sup>  
8 Katherine Bowers, PhD <sup>2</sup>  
9 Lawrence M. Dolan, MD <sup>4</sup>  
10 Ranjan Deka, PhD <sup>1</sup>  
11 Chandra L. Jackson, PhD, MS <sup>3</sup>  
12 Jane C. Khoury, PhD <sup>2,4</sup>  
13  
14  
15

16 <sup>1</sup> Department of Environmental Health, University of Cincinnati, College of Medicine,  
17 Cincinnati, OH, USA

18 <sup>2</sup> Division of Biostatistics and Epidemiology, Cincinnati Children's Hospital Medical Center,  
19 Cincinnati, OH, USA

20 <sup>3</sup> Epidemiology Branch, National Institute of Environmental Health Sciences, National Institutes  
21 of Health, Department of Health and Human Services, Research Triangle Park, NC, USA

22 <sup>4</sup> Division of Endocrinology, Cincinnati Children's Hospital Medical Center, Cincinnati, OH, USA  
23  
24

25 Please direct correspondence to Dr. Ketrell L. McWhorter at 111 T.W. Alexander Drive, Building  
26 101, Room A353, Research Triangle Park, NC 27709, tel: (919) 316-4867, fax (301) 480-3290;  
27 email: [ketrell.mcwhorter@nih.gov](mailto:ketrell.mcwhorter@nih.gov).  
28

29 Word Count

30 Abstract: 297  
31 Text: 3688  
32 Tables: 5  
33 Supplemental Tables: 2  
34 References: 40  
35 Keywords: Type 1 Diabetes, pre-pregnancy body mass index,  
36 gestational weight gain, large-for-gestational age  
37 Running Title: Gestational Weight Gain and LGA Infants of Mothers with  
38 T1DM  
39 Date: January 17, 2018  
40  
41  
42  
43  
44  
45  
46  
47  
48  
49  
50  
51  
52  
53  
54  
55  
56  
57  
58  
59  
60

1  
2  
3 **Objectives** Despite improvements in treatment modalities, large-for-gestational age (LGA)  
4 prevalence has remained between 30-40% among infants of mothers with Type I Insulin-  
5 Dependent Diabetes (T1DM). Our objective was to estimate LGA prevalence and examine the  
6 association between gestational weight gain (GWG) and pre-pregnancy body mass index (BMI)  
7 with LGA among mothers with T1DM.  
8  
9  
10  
11  
12

13  
14 **Design** Cross-sectional study.  
15

16  
17 **Setting** Regional data in Cincinnati, OH, from the Diabetes in Pregnancy Program Project  
18 (PPG), a prospective cohort for the period 1978-1993; national data from Consortium on Safe  
19 Labor (CSL), a multi-center cross-sectional study for the period 2002-2008.  
20  
21  
22

23  
24 **Participants** The study included 333 pregnancies in the PPG, and 358 pregnancies in the  
25 CSL. Pregnancies delivered prior to 23 weeks' gestation were excluded. Women with T1DM in  
26 the PPG were identified according to physician confirmation of ketoacidosis, and or c-peptide  
27 levels, and by International Classification of Diseases (ICD)-9 codes within the CSL. LGA was  
28 identified as birthweight > 90th percentile according to gestational age, race and sex.  
29  
30  
31  
32  
33

34  
35 **Main outcome measure** LGA at birth.  
36

37  
38 **Results** Mean  $\pm$  standard deviation maternal age at delivery was 26.4  $\pm$ 5.1 years for PPG  
39 women and 27.5  $\pm$ 6.0 years for CSL women,  $p=0.008$ . LGA prevalence did not significantly  
40 change between cohorts (PPG: 40.2% vs CSL: 36.6%,  $p=0.32$ ). More women began pregnancy  
41 as overweight in the later cohort (PPG (16.8%) vs CSL (27.1%),  $p<0.001$ ). GWG exceeding  
42 Institute of Medicine (IOM) guidelines increased from PPG (42.3%) to CSL (56.2%),  
43  $p<0.001$ . Normal weight women with GWG within IOM guidelines was associated with reduced  
44 LGA prevalence in CSL (PPG: 30.6% vs CSL: 13.7%),  $p=0.001$ .  
45  
46  
47  
48  
49  
50  
51  
52  
53  
54  
55  
56  
57  
58  
59  
60

1  
2  
3 **Conclusions** Normal weight women with GWG within IOM guidelines experienced a reduction  
4  
5 in LGA prevalence, supporting the importance of adherence to IOM guidelines for GWG to  
6  
7 reduce LGA. Increasing BMI and GWG may be hindering a reduction in LGA prevalence.  
8  
9  
10  
11  
12  
13  
14  
15  
16  
17  
18  
19  
20  
21  
22  
23  
24  
25  
26  
27  
28  
29  
30  
31  
32  
33  
34  
35  
36  
37  
38  
39  
40  
41  
42  
43  
44  
45  
46  
47  
48  
49  
50  
51  
52  
53  
54  
55  
56  
57  
58  
59  
60

For peer review only

## Key words

Type I Diabetes

Pre-pregnancy body mass index

Gestational weight gain

Large-for-gestational age

## Strengths and limitations of this study

- We had access to two cohorts of women with T1DM across a 30-year time period covering an era of major advancements in insulin treatment and delivery, and emergence of obesity as a prevalent chronic disease, potentially representing opposing risks for delivery of a large-for-gestational age (LGA) baby.
- The Diabetes in Pregnancy Program Project (PPG) cohort includes frequent, repeated observations of women during pregnancy while the Consortium on Safe Labor (CSL) provides a national, contemporary large-scale database.
- Glucose control was not available in CSL precluding comparison between groups.
- The potential differences between local (PPG) and national (CSL) populations include regional differences in diet, methods of treatment, racial composition and geography, limiting the generalizability of our results.
- Despite the importance of nephropathy and retinopathy as indicators of diabetes severity potentially affecting glucose transport, differing definitions between the cohorts prevented variable harmonization, and therefore prohibited the adjustment of these factors in our study.

## BACKGROUND

Despite advancements in insulin treatment and delivery for those with Type I Insulin-Dependent Diabetes (T1DM)<sup>1,2</sup>, the prevalence of neonatal large-for-gestational age (LGA) among women in this population remains high<sup>1,3-5</sup>. LGA prevalence has remained at 30-40% among infants of mothers with T1DM<sup>5-7</sup>. Independently associated maternal factors for LGA include maternal age, race, stature/height<sup>8</sup>, ethnicity and parity<sup>5,9-12</sup>, excessive fetal nutrition<sup>13</sup> mediated by maternal hyperglycemia<sup>2</sup>, excessive gestational weight gain (GWG)<sup>5,14-16</sup> and pre-pregnancy body mass index (BMI)<sup>10,14,17,18</sup>. LGA infants of mothers with diabetes are at increased risk for fetal distress<sup>6</sup> leading to cesarean section<sup>19</sup>, and also obesity<sup>20-22</sup>, insulin resistance (IR)<sup>20</sup>, type II diabetes mellitus (T2DM) and cardiovascular compromise<sup>23,24</sup> in adolescence and adulthood.

The steady state of higher perinatal birthweight among offspring of mothers with T1DM, even in the presence of tight glucose control, has promoted studies that emphasize the independent role of both increased rates of pre-pregnancy BMI<sup>19</sup> and excessive GWG<sup>15</sup> on neonatal outcome. According to data from NHANES, between 2011 and 2014, nearly 34% of women aged 20-39 years were obese<sup>25</sup>. Most recently, among all women who delivered a live infant in 2014, nearly 50% had a pre-pregnancy BMI of either overweight (25.6%) or obese (24.8%)<sup>25</sup>.

In addition to the trend in increasing pre-pregnancy BMI, more women are gaining weight in excess of the 2009 Institute of Medicine (IOM) guidelines for GWG<sup>26-28</sup>. According to the IOM and National Research Council in "Reexamining the Guidelines", there has been an upward trend in GWG from 1990-2005<sup>28</sup>. Women with T1DM who gain excessive gestational weight have been found to be at even greater risk of LGA, perhaps due to excessive fetal nutrition resulting from increased maternal carbohydrate intake following hypoglycemic events<sup>15</sup>. Other studies have suggested insulin resistance developing as early as in utero<sup>29</sup> as a result of overproduction of fetal insulin in response to circulating maternal glucose crossing the placenta<sup>30</sup>. The fetus then stores this surplus energy as fat and can result in perinatal

1  
2  
3 complications such as LGA<sup>18</sup>. Given these two trends and the link between the hyperglycemic  
4 intrauterine environment and fetal overnutrition<sup>19 31 32</sup>, women with T1DM belonging to higher  
5 BMI subgroups, who exceed IOM guidelines for GWG, may be at the greatest risk of LGA.  
6  
7

8  
9 In an effort to understand the implications of excessive GWG and pre-pregnancy BMI  
10 within this population, we compared LGA infants observed in the Diabetes in Pregnancy  
11 Program Project (PPG), a cohort of women with T1DM going through pregnancy, studied from  
12 1978 to 1993, to those in the Consortium on Safe Labor (CSL), a more contemporary T1DM  
13 population delivering between 2002 and 2008. We aim to establish the potential change in  
14 prevalence of LGA among infants exposed to maternal T1DM between 1978-1993 and 2002-  
15 2008. We also aim to determine associations between adherence to IOM guidelines for GWG  
16 and LGA outcome among mothers with T1DM, across pre-pregnancy BMI categories, to identify  
17 subgroups who may be at highest risk for LGA. These findings will help interpret the literature  
18 on IOM guidelines for GWG in the T1DM population as well as inform future research focusing  
19 on reducing LGA births among infants exposed to maternal hyperglycemic environments.  
20  
21  
22  
23  
24  
25  
26  
27  
28  
29  
30  
31

## 32 33 **RESEARCH DESIGN AND METHODS**

34  
35  
36 **Diabetes in Pregnancy Program Project (PPG):** The PPG study enrolled 303 women  
37 with T1DM in a cohort in Cincinnati, Ohio from 1978-1993 for a total of 372 pregnancies going  
38 beyond 23 weeks' gestation. After exclusions (see below), the analytic population included 333  
39 pregnancies. Participants in the PPG were recruited preconceptionally or during the first half of  
40 the pregnancy period as part of a program funded by the National Institute of Health (NIH) in  
41 order to examine the impact of strict glycemic control during pregnancy on the rate of adverse  
42 maternal and neonatal outcomes in mothers with T1DM. The interdisciplinary core of this study  
43 involved endocrinologists, perinatologists, and neonatologists. T1DM study subjects recruited  
44 and enrolled into the program belonged to White's classification B to RT<sup>33</sup>. Two levels of  
45 glycemic control were defined to manage diabetes care: subjects enrolling prior to 9 completed  
46  
47  
48  
49  
50  
51  
52  
53  
54  
55  
56  
57

1  
2  
3 weeks of gestation were randomized to strict or customary glycemc control. A third group  
4 included women enrolling after 9 completed weeks' gestation; they were managed according to  
5 customary glycemc control. Fasting blood glucose and 90-minute post-prandial glucose targets  
6 for strict glycemc control were: <100 mg/dl and <120 mg/dl respectively; for customary glycemc  
7 control: <120 mg/dl and <140 mg/dl, respectively<sup>33</sup>. Extensive gestational and outcome data  
8 were collected including weekly weight, blood pressure, insulin requirements, urinalysis and  
9 medication use, multiple daily glucose concentrations and detailed delivery and neonatal  
10 outcome information.  
11  
12  
13  
14  
15  
16  
17  
18  
19

20 **Consortium on Safe Labor (CSL):** The CSL study enrolled 208,695 women in a  
21 national multi-center observational study from 2002-2008 for a total of 228,562 deliveries. A  
22 total of 594 singleton T1DM pregnancies with delivery at  $\geq 23$  weeks' gestation were identified.  
23 After exclusions, the analytic population included 358 pregnancies. There were 11 (out of 12)  
24 sites represented in the CSL sample of pregnancy complicated by T1DM.  
25  
26  
27  
28  
29

30 The National Institute of Child Health and Human Development (NIHCD), of the NIH,  
31 initiated a retrospective, observational study in a contemporary U.S. obstetric population to  
32 reexamine labor progression trends that have long been guided by the Friedman curve. The  
33 CSL study included medical records from a population of women from a consortium of 12 U.S.  
34 hospitals located across 9 districts of the American College of Obstetricians and Gynecologists  
35 and has been described in detail elsewhere<sup>34</sup>. Briefly, patient electronic medical records were  
36 extracted, de-identified and entered into a Data Coordinating database which maintained over  
37 225,000 deliveries  $\geq 23$  weeks' gestation from 2002 to 2008. Each delivery included ICD-9  
38 codes as well as information related to maternal demographics, maternal weight (kg) and height  
39 (m) at admission, prenatal history, preeclampsia, blood pressure, reports of uterine and intra-  
40 amniotic infections, anesthesia, obstetric trauma, medication, delivery method, infant  
41 birthweight, length, Apgar scores at 1 and 5 minutes, gestational age at delivery and post-natal  
42 time spent in the neurointensive care unit (NICU). Data received by the Data Coordinating  
43  
44  
45  
46  
47  
48  
49  
50  
51  
52  
53  
54  
55  
56  
57  
58  
59  
60



Center from each clinical site was mapped to pre-defined codes for each variable. Data underwent inquiries, cleaning, recoding and logic checking. In addition, validation studies were performed to ensure electronic medical records accurately represented medical record charts<sup>34</sup>.

Inclusion and exclusion criteria for the current study were identical for each study cohort. Inclusion criteria included T1DM and gestation at 23 completed weeks or later. Exclusion criteria were multiple gestation, fetal anomaly, stillbirth, and missing the outcome and primary exposure variables; birthweight of the neonate, maternal pre-pregnancy and delivery weight and maternal height. No exclusions were made regarding race/ethnicity or age. For women with more than one pregnancy during the study, all pregnancies were included. In addition, no exclusions were made in the CSL based on geographic site.

GWG and pre-pregnancy BMI were the primary exposures of interest, and LGA was the outcome of interest. Potential confounding maternal characteristics of interest included maternal age at delivery, race, parity and preeclampsia. Pre-pregnancy BMI was additionally treated as a potential modifier of the relationship between GWG and LGA. IRB approval was obtained from Cincinnati Children's Hospital Medical Center as well as the University of Cincinnati prior to the secondary analysis of PPG and CSL cohorts.

### Statistical Analysis

In two different cohorts, we conducted an analysis on mothers with T1DM who had singleton pregnancies. Women with T1DM in the PPG study were identified according to physician confirmation of ketoacidosis, and or c-peptide levels. Within the CSL cohort, International Classification of Diseases (ICD)-9 codes 250.01, 250.03, 250.21, 250.23, 250.31, 250.33, 250.41, 250.43, 250.51, 250.53, 250.61, 250.63, 250.71, 250.73, 250.81, 250.83, 250.91, 250.93 were utilized to identify women with T1DM. To determine LGA classification for each cohort, a McNemar's test of marginal homogeneity was performed comparing Lubchenco curves to both Cincinnati-based reference population growth curves for PPG and medical chart

1  
2  
3 LGA classifications for CSL. LGA was finally defined as birthweight > 90th percentile and was  
4 classified by gestational age-, race- and sex-specific curves according to Lubchenco<sup>35</sup> for the  
5 PPG cohort and by the extracted variable from detailed medical chart review for CSL. Pre-  
6 pregnancy BMI was calculated by using self-reported weight prior to pregnancy and height,  
7 recorded at the initial visit for women in the PPG and at the labor and delivery admission for  
8 women in the CSL. Underweight, normal weight, overweight and obese pre-pregnancy BMI  
9 classifications were defined as:  $BMI < 18.5 \text{ kg/m}^2$ ;  $18.5 \leq BMI < 25 \text{ kg/m}^2$ ,  $25 \leq BMI < 30 \text{ kg/m}^2$  and  
10  $BMI \geq 30 \text{ kg/m}^2$ , respectively. GWG was defined as weight at admission for delivery minus pre-  
11 pregnancy weight (kg). IOM adherence for GWG was categorized utilizing the pre-pregnancy  
12 BMI-specific 2009 guidelines as under, within (underweight: 12.5-18.0 kg; normal: 11.5-16.0 kg;  
13 overweight: 7.0-11.5 kg; obese (all classes): 5.0-9.0 kg) or over IOM guidelines. Calculations for  
14 recommended weight gain assume a 0.5-2.0 kg weight gain in the first trimester<sup>28</sup>. Variables  
15 within PPG and CSL were harmonized for comparative analysis. Race was based on self-  
16 identification, and was categorized as black, white or other. Due to the small number of obese  
17 women in the PPG cohort, overweight and obese BMI categories were combined for analysis.  
18 Continuous and categorical variables are represented with mean ( $\pm$ SD) and n (%), respectively.  
19 Maternal characteristics were compared between and within cohorts by LGA status and by  
20 adherence to IOM guidelines for GWG (under, within and over) using Chi-square or Fisher's  
21 exact test, and analysis of variance (ANOVA) or Wilcoxon rank sum, as appropriate. Normality  
22 testing for distribution of continuous variables was performed by examining histograms, stem-  
23 leaf plots, and Kolmogorov-Smirnov tests. A site frequency distribution was examined to  
24 investigate possible bias in site representation in the CSL sample. Bonferroni was used to  
25 adjust for multiple testing. Generalized Estimating Equations (GEE) were used to estimate the  
26 odds ratio (OR) of giving birth to an LGA infant for women exceeding IOM guidelines vs women  
27 who adhered to IOM guidelines to account for inherent correlation among women with multiple  
28 pregnancies in each study. General linear models were used to examine the relationships  
29  
30  
31  
32  
33  
34  
35  
36  
37  
38  
39  
40  
41  
42  
43  
44  
45  
46  
47  
48  
49  
50  
51  
52  
53  
54  
55  
56  
57

1  
2  
3 between GWG and birthweight. To determine whether IOM adherence varied across BMI  
4 categories ( $18.5 \leq \text{BMI} < 25$ ,  $25 \leq \text{BMI} < 30$ ,  $\text{BMI} \geq 30 \text{ kg/m}^2$ ) interaction terms were used to evaluate  
5 effect modification. Normal weight women within IOM guidelines for GWG was used as the  
6 reference category. Models adjusted for potential confounders, selected a priori as risk factors  
7 for GWG and LGA and not on the causal pathway, included age, race, parity, pre-pregnancy  
8 BMI and preeclampsia. All tests for significance were two-sided and a  $p$ -value of less than 0.05  
9 was considered statistically significant, appropriately adjusted as necessary. Statistical  
10 analyses were completed using SAS® software version 9.4 (SAS Institute, Cary NC).

## 21 22 RESULTS

23  
24 Table 1 shows maternal characteristics and neonatal outcomes in each cohort. Mean  
25 age at delivery was significantly higher for women in the CSL ( $27.5 \pm 6.0$ ) than for women in the  
26 PPG ( $26.4 \pm 5.1$ ),  $p=0.008$ . There was a higher proportion of black women in the CSL (19.3%)  
27 than in the PPG (14.1%). The CSL had a significantly greater proportion of overweight/obese  
28 women (51.4%) than the PPG (20.7%),  $p<0.001$ . More women exceeded IOM guidelines for  
29 GWG in the CSL (56.2%) than in the PPG (42.3%),  $p<0.001$ , with overweight/obese women  
30 accounting for 58.7% and 41.1% of all women who exceeded guidelines, respectively (table  
31 S1).

32  
33 There was no significant difference in cesarean section rate between the CSL (66.8%)  
34 and PPG (70.0%),  $p=0.36$ . Women were more likely to deliver at less than 37 weeks' in the  
35 CSL (42.6%) than in the PPG (34.2%),  $p=0.03$ .

**Table 1. Maternal characteristics and neonatal outcomes in PPG (1978-1993) and CSL (2002-2008) cohorts**

|                                                                  | PPG        | CSL        |         |
|------------------------------------------------------------------|------------|------------|---------|
| Maternal Characteristics                                         | n=333      | n=358      | p value |
| Maternal age at delivery (years)                                 | 26.4 ± 5.1 | 27.5 ± 6.0 | 0.008   |
| Married, yes <sup>b</sup>                                        | 224 (67.3) | 217 (60.6) | 0.01    |
| Race                                                             |            |            | <0.001  |
| White                                                            | 282 (84.7) | 225 (62.8) |         |
| Black                                                            | 47 (14.1)  | 69 (19.3)  |         |
| Other                                                            | 4 (1.20)   | 64 (17.9)  |         |
| Nulliparous, yes                                                 | 166 (49.9) | 183 (51.1) | 0.74    |
| Pre-pregnancy BMI (kg/m <sup>2</sup> )                           | 23.0 ± 3.4 | 26.9 ± 6.3 | <0.001  |
| Pre-pregnancy BMI category                                       |            |            | <0.001  |
| Underweight (BMI<18.5 kg/m <sup>2</sup> )                        | 11 (3.3)   | 6 (1.7)    |         |
| Normal (18.5 kg/m <sup>2</sup> ≤BMI<25.0 kg/m <sup>2</sup> )     | 253 (76.0) | 168 (46.9) |         |
| Overweight (25.0 kg/m <sup>2</sup> ≤BMI<30.0 kg/m <sup>2</sup> ) | 56 (16.8)  | 97 (27.1)  |         |
| Obese (BMI≥30.0 kg/m <sup>2</sup> )                              | 13 (3.90)  | 87 (24.3)  |         |
| Pre-pregnancy Overweight/Obese                                   | 69 (20.7)  | 184 (51.4) | <0.001  |
| Gestational Weight Gain (kg)                                     | 14.4 ± 5.6 | 14.5 ± 7.4 | 0.77    |
| IOM Guidelines                                                   |            |            |         |
| Under                                                            | 74 (22.2)  | 62 (17.3)  | <0.001  |
| Within                                                           | 118 (35.5) | 95 (26.5)  |         |
| Over                                                             | 141 (42.3) | 201 (56.2) |         |
| Preeclampsia, yes                                                | 50 (15.0)  | 55 (15.4)  | 0.90    |
| Previous cesarean section, yes <sup>b</sup>                      | 105 (31.6) | 86 (24.0)  | 0.08    |
| Cesarean section, yes                                            | 233 (70.0) | 239 (66.8) | 0.36    |
| Preterm delivery, yes                                            |            |            |         |
| Delivery prior to 34 weeks                                       | 33 (9.9)   | 48 (13.4)  | 0.15    |
| Delivery prior to 37 weeks                                       | 114 (34.2) | 152 (42.6) | 0.03    |
| Neonatal Outcomes <sup>a</sup>                                   |            |            |         |
| Male                                                             | 186 (56.2) | 193 (53.9) | 0.60    |
| Respiratory distress during labor                                | 37 (11.1)  | 45 (12.8)  | 0.49    |
| Gestational age (weeks)                                          | 37.0 ± 2.4 | 36.1 ± 2.7 | <0.001  |
| Apgar less than 7 (@5 min)                                       | 59 (17.7)  | 23 (6.4)   |         |

Mean ± SD are shown for all continuous variables and n (%) are shown for categorical variables; PPG: Diabetes in Pregnancy Program Project; CSL: Consortium on Safe Labor.

<sup>a</sup> Neonatal outcomes exclude stillbirths and neonatal deaths

<sup>b</sup> PPG: Marital status missing for 11 women; CSL: Previous cesarean section missing for 20 women.

While we observed no difference in overall LGA prevalence between cohorts (CSL: 36.6% vs. PPG: 40.2%, p=0.32), Table 2 shows a lower prevalence of LGA among women in

CSL compared with PPG (13.7% versus 30.6%) who were normal weight and gained within IOM guidelines.

**Table 2. Large-for-Gestational Age prevalence within each BMI and IOM adherence subgroup for women in PPG (1978-1993) and CSL (2002-2008) cohorts**

| IOM adherence | Pre-pregnancy BMI | PPG        |            |                    | CSL        |            |                   | p value     |
|---------------|-------------------|------------|------------|--------------------|------------|------------|-------------------|-------------|
|               |                   | N          | LGA        | % LGA <sup>a</sup> | N          | LGA        | %LGA <sup>a</sup> |             |
| <b>Under</b>  |                   |            |            |                    |            |            |                   |             |
|               | underweight       | 4          | 1          | 0.7%               | 2          | 1          | 0.8%              | 0.99        |
|               | normal            | 67         | 20         | 14.9%              | 33         | 8          | 6.1%              | 0.02        |
|               | overweight/obese  | 3          | 1          | 0.7%               | 27         | 6          | 4.6%              | 0.06        |
| <b>Within</b> |                   |            |            |                    |            |            |                   |             |
|               | underweight       | 7          | 3          | 2.2%               | 3          | 0          | 0.0%              | 0.25        |
|               | normal            | 103        | 41         | 30.6%              | 53         | 18         | 13.7%             | 0.001       |
|               | overweight/obese  | 8          | 0          | 0.0%               | 39         | 12         | 9.2%              | 0.0003      |
| <b>Over</b>   |                   |            |            |                    |            |            |                   |             |
|               | underweight       | 0          | 0          | 0.0%               | 1          | 0          | 0.0%              | -           |
|               | normal            | 83         | 38         | 28.4%              | 82         | 37         | 28.2%             | 0.98        |
|               | overweight/obese  | 58         | 30         | 22.4%              | 118        | 49         | 37.4%             | 0.008       |
| <b>Total</b>  |                   | <b>333</b> | <b>134</b> | <b>40.2%</b>       | <b>358</b> | <b>131</b> | <b>36.6%</b>      | <b>0.32</b> |

IOM=Institute of Medicine; BMI=body mass index (kg/m<sup>2</sup>); LGA=large-for-gestational age; PPG: Diabetes in Pregnancy Program Project; CSL: Consortium on Safe Labor.

<sup>a</sup> % LGA for each IOM guideline adherence and pre-pregnancy BMI category are presented as proportions of total LGA infants for each category.

BMI was defined as: underweight (BMI<18.5 kg/m<sup>2</sup>); normal (18.5 kg/m<sup>2</sup>≤BMI<25.0 kg/m<sup>2</sup>); overweight (25.0 kg/m<sup>2</sup>≤BMI<30.0 kg/m<sup>2</sup>); obese (BMI≥30.0 kg/m<sup>2</sup>).

The distribution of LGA by BMI categories has significantly changed over time (see table 3). While normal weight women still have the highest proportion of LGA infants in both the CSL and PPG (48.1% vs 73.9%), there was an increase in overweight women delivering LGA infants over time, from 17.2% (PPG) to 29.8% (CSL),  $p<.0001$ . Normal weight women in the CSL, on average, gained 2.4 kg more over gestation than normal weight women in the PPG. In contrast, overweight women in the CSL, on average, gained 2.6 kg less than overweight women in the PPG (table S2).

**Table 3. Maternal characteristics of women in PPG (1978-1993) and CSL (2002-2008) cohorts by LGA classification**

| Characteristic                                                   | PPG           |            |         | CSL        |            |         |
|------------------------------------------------------------------|---------------|------------|---------|------------|------------|---------|
|                                                                  | LGA Lubchenco | non-LGA    | p value | LGA Chart  | non-LGA    | p value |
| n (%)                                                            | 134 (40.2)    | 199 (59.8) |         | 131 (36.6) | 227 (63.4) |         |
| Maternal age at delivery, years                                  | 26.5±4.9      | 26.4±5.2   | 0.83    | 27.5 ±6.1  | 27.6±6.0   | 0.92    |
| Married, yes                                                     | 94 (70.1)     | 130 (65.3) | 0.08    | 87 (66.4)  | 130 (57.3) | 0.09    |
| Race                                                             |               |            | 0.36    |            |            | 0.001   |
| White                                                            | 118 (88.1)    | 164 (82.4) |         | 97 (74.1)  | 128 (56.4) |         |
| Black                                                            | 15 (11.2)     | 32 (16.1)  |         | 13 (9.9)   | 56 (24.7)  |         |
| Other                                                            | 1 (0.78)      | 3 (1.5)    |         | 21 (16.0)  | 43 (18.9)  |         |
| Nulliparous, yes                                                 | 59 (44.0)     | 107 (53.8) | 0.08    | 60 (45.8)  | 123 (54.2) | 0.13    |
| Pre-pregnancy BMI (kg/m <sup>2</sup> )                           | 23.3±3.6      | 22.7±3.2   | 0.9     | 26.7±5.8   | 26.9±6.5   | 0.77    |
| Pre-pregnancy BMI category                                       |               |            | 0.45    |            |            | 0.5     |
| Underweight (BMI<18.5 kg/m <sup>2</sup> )                        | 4 (3.0)       | 7 (3.5)    |         | 1 (0.76)   | 5 (2.2)    |         |
| Normal (18.5 kg/m <sup>2</sup> ≤BMI<25.0 kg/m <sup>2</sup> )     | 99 (73.9)     | 154 (77.4) |         | 63 (48.1)  | 105 (46.3) |         |
| Overweight (25.0 kg/m <sup>2</sup> ≤BMI<30.0 kg/m <sup>2</sup> ) | 23 (17.2)     | 33 (16.6)  |         | 39 (29.8)  | 58 (25.6)  |         |
| Obese (BMI≥30.0 kg/m <sup>2</sup> )                              | 8 (6.0)       | 5 (2.5)    |         | 28 (21.4)  | 59 (26.0)  |         |
| Pre-pregnancy Overweight/Obese                                   | 31 (23.1)     | 38 (19.1)  | 0.38    | 67 (51.2)  | 117 (51.5) | 0.94    |
| Gestational Weight Gain (kg)                                     | 15.7±5.4      | 13.5±5.7   | <.0001  | 16.3±7.2   | 13.5±7.3   | 0.0004  |
| IOM Guidelines                                                   |               |            | 0.02    |            |            | 0.01    |
| Under                                                            | 22 (16.4)     | 52 (26.1)  |         | 15 (11.5)  | 47 (20.7)  |         |
| Within                                                           | 44 (32.8)     | 74 (37.2)  |         | 30 (22.9)  | 65 (28.6)  |         |
| Over                                                             | 68 (50.8)     | 73 (36.7)  |         | 86 (65.7)  | 115 (50.7) |         |
| Preeclampsia, yes                                                | 11 (8.2)      | 39 (19.6)  | 0.004   | 19 (14.5)  | 36 (15.9)  | 0.73    |
| Previous cesarean section, yes                                   | 45 (33.8)     | 60 (30.2)  | 0.48    | 38 (29.9)  | 48 (22.8)  | 0.14    |
| Cesarean section, yes                                            | 97 (72.4)     | 136 (68.3) | 0.43    | 91 (69.5)  | 148 (65.2) | 0.41    |
| Preterm delivery                                                 |               |            |         |            |            |         |
| Delivery prior to 34 weeks                                       | 6 (4.5)       | 27 (13.6)  | 0.007   | 11 (8.4)   | 37 (16.3)  | 0.03    |
| Delivery prior to 37 weeks                                       | 38 (28.4)     | 76 (38.2)  | 0.06    | 55 (42.0)  | 97 (42.7)  | 0.89    |
| Neonatal Outcomes                                                |               |            |         |            |            |         |
| Male                                                             | 81 (61.4)     | 105 (52.8) | 0.12    | 71 (54.2)  | 122 (54.2) | 1.0     |
| Respiratory distress during labor                                | 11 (8.2)      | 26 (13.1)  | 0.17    | 16 (12.5)  | 29 (13.0)  | 0.89    |
| Gestational Age, weeks                                           | 37.5±1.9      | 36.6±2.7   | 0.001   | 36.3±2.2   | 36.0±3.0   | 0.22    |
| Apgar less than 7 (@5 min)                                       | 20 (14.9)     | 39 (19.6)  | 0.27    | 9 (6.87)   | 14 (6.2)   | 0.79    |

Mean ± SD are shown for all continuous variables and n(%) are shown for categorical variables

IOM=Institute of Medicine; BMI=body mass index (kg/m<sup>2</sup>); LGA=large-for-gestational age; PPG=Diabetes in Pregnancy Program Project; CSL=Consortium on Safe Labor.

LGA was defined as infants with a birthweight >90th percentile, adjusted for age, sex and race.

Neonatal outcomes exclude stillbirths and neonatal deaths.

Table 4 shows separate associations between pre-pregnancy BMI and GWG with odds of LGA for all women in each cohort. Entering pregnancy with higher BMI did not appear to be an independent predictor of LGA in either group.

**Table 4. Association between abnormal pre-pregnancy BMI and unrecommended gestational weight gain compared to normal weight participants within IOM adherence guidelines among PPG (1978-1993) and CSL (2002-2008) study cohorts**

| PPG                            | Model I           | Model II          | Model III         |
|--------------------------------|-------------------|-------------------|-------------------|
|                                | OR (95% CI)       | OR (95% CI)       | OR (95% CI)       |
| <b>Pre-pregnancy BMI</b>       |                   |                   |                   |
| Normal/Underweight             | 1.00 (ref)        | 1.00 (ref)        | -                 |
| Overweight/Obese               | 1.28 (0.70, 2.32) | 1.44 (0.79, 2.63) | -                 |
| <b>Gestational Weight Gain</b> |                   |                   |                   |
| Under                          | 0.71 (0.39, 1.31) | 0.76 (0.41, 1.41) | 0.76 (0.41, 1.42) |
| Within                         | 1.00 (ref)        | 1.00 (ref)        | 1.00 (ref)        |
| Over                           | 1.57 (0.92, 2.65) | 1.55 (0.90, 2.67) | 1.53 (0.86, 2.71) |
| <b>CSL</b>                     |                   |                   |                   |
|                                | Model I           | Model II          | Model III         |
|                                | OR (95% CI)       | OR (95% CI)       | OR (95% CI)       |
| <b>Pre-pregnancy BMI</b>       |                   |                   |                   |
| Underweight                    | 0.33 (0.04, 2.92) | 0.38 (0.03, 4.21) | -                 |
| Normal                         | 1.00 (ref)        | 1.00 (ref)        | -                 |
| Overweight                     | 1.12 (0.67, 1.87) | 1.32 (0.77, 2.26) | -                 |
| Obese                          | 0.79 (0.46, 1.36) | 1.04 (0.58, 1.86) | -                 |
| <b>Gestational Weight Gain</b> |                   |                   |                   |
| Under                          | 0.69 (0.33, 1.43) | 0.75 (0.35, 1.60) | 0.73 (0.34, 1.58) |
| Within                         | 1.00 (ref)        | 1.00 (ref)        | 1.00 (ref)        |
| Over                           | 1.62 (0.97, 2.72) | 1.54 (0.91, 2.63) | 1.46 (0.84, 2.52) |

OR=odds ratio (95% confidence interval); IOM=Institute of Medicine; BMI=body mass index ( $\text{kg}/\text{m}^2$ ); LGA=large-for-gestational age; PPG: Diabetes in Pregnancy Program Project; CSL: Consortium on Safe Labor.

Model I - Adjusted for age

Model II - Adjusted for Model I + maternal race, parity, preeclampsia

Model III - Adjusted for Model II + pre-pregnancy BMI

BMI was defined as: underweight ( $\text{BMI} < 18.5 \text{ kg}/\text{m}^2$ ); normal ( $18.5 \text{ kg}/\text{m}^2 \leq \text{BMI} < 25.0 \text{ kg}/\text{m}^2$ ); overweight ( $25.0 \text{ kg}/\text{m}^2 \leq \text{BMI} < 30.0 \text{ kg}/\text{m}^2$ ); obese ( $\text{BMI} \geq 30.0 \text{ kg}/\text{m}^2$ ).

When considering all BMI groups collectively, exceeding IOM guidelines for GWG vs. remaining within IOM guidelines was not a significant predictor of increased risk for LGA in either cohort.

The OR adjusted for age for mothers who exceeded IOM guidelines compared to those who remained within guidelines was similar for women in the CSL [OR 1.60, 95%CI (0.95, 2.68),  $p=0.08$ ] compared to mothers in the PPG [OR 1.57, 95%CI (0.92, 2.65),  $p=0.10$ ]. There was

also no significant difference in average total GWG between the groups,  $14.5 \pm 7.4$  for CSL and  $14.4 \pm 5.6$  for PPG ( $p=0.77$ ). There remained no significant increase in risk of LGA after further adjustments for covariates and pre-pregnancy BMI for either group.

In the CSL, normal weight women who exceeded IOM guidelines [OR 2.14 95%CI (1.17, 3.91),  $p=0.01$ ] and overweight women who exceeded IOM guidelines [OR 2.35 95%CI (1.26, 4.40),  $p=0.01$ ] had increased odds of LGA after adjusting for age when compared to the normal weight women who did not exceed IOM guidelines, as shown in Table 5.

**Table 5. Adjusted odds ratios (95% CI) for LGA by abnormal pre-pregnancy BMI and unrecommended gestational weight gain compared to normal weight participants within IOM adherence guidelines among PPG (1978-1993) and CSL (2002-2008) cohorts**

|               |                    |     | Model I           |      | Model II          |      |
|---------------|--------------------|-----|-------------------|------|-------------------|------|
|               |                    |     | OR (95% CI)       |      | OR (95% CI)       |      |
| <b>PPG</b>    |                    |     |                   |      |                   |      |
| IOM adherence | Pre-pregnancy BMI  | n   | <i>p</i> value    |      | <i>p</i> value    |      |
| <b>Within</b> | normal/underweight | 110 | 1.00 (ref)        |      | 1.00 (ref)        |      |
|               | overweight/obese   | 8   | -                 |      | -                 |      |
| <b>Over</b>   | normal/underweight | 83  | 1.61 (0.93, 2.80) | 0.09 | 1.48 (0.83, 2.64) | 0.18 |
|               | overweight/obese   | 58  | 2.04 (1.05, 3.97) | 0.03 | 2.12 (1.11, 4.04) | 0.02 |
|               |                    |     | Model I           |      | Model II          |      |
| <b>CSL</b>    |                    |     | OR (95% CI)       |      | OR (95% CI)       |      |
| IOM adherence | Pre-pregnancy BMI  | n   |                   |      |                   |      |
| <b>Within</b> | Normal             | 56  | 1.00 (ref)        |      | 1.00 (ref)        |      |
|               | Overweight         | 15  | 0.38 (0.08, 1.81) | 0.23 | 0.53 (0.10, 2.73) | 0.45 |
|               | Obese              | 23  | 1.86 (0.75, 4.60) | 0.18 | 1.99 (0.79, 5.01) | 0.15 |
| <b>Over</b>   | Normal             | 82  | 2.14 (1.17, 3.91) | 0.01 | 1.83 (0.99, 3.40) | 0.06 |
|               | Overweight         | 70  | 2.35 (1.26, 4.40) | 0.01 | 2.25 (1.18, 4.28) | 0.01 |
|               | Obese              | 49  | 1.26 (0.61, 2.59) | 0.53 | 1.49 (0.70, 3.19) | 0.30 |

OR=odds ratio; 95% confidence interval (CI); IOM=Institute of Medicine; BMI=body mass index ( $\text{kg}/\text{m}^2$ ); LGA=large-for-gestational age; PPG: Diabetes in Pregnancy Program Project; CSL: Consortium on Safe Labor.

Model I - Adjusted for age

Model II - Adjusted for Model I + maternal race, parity, preeclampsia

BMI was defined as: underweight ( $\text{BMI} < 18.5 \text{ kg}/\text{m}^2$ ); normal ( $18.5 \text{ kg}/\text{m}^2 \leq \text{BMI} < 25.0 \text{ kg}/\text{m}^2$ ); overweight ( $25.0 \text{ kg}/\text{m}^2 \leq \text{BMI} < 30.0 \text{ kg}/\text{m}^2$ ); obese ( $\text{BMI} \geq 30.0 \text{ kg}/\text{m}^2$ ).

Insufficient LGA infants of overweight/obese women who remained within IOM guidelines to make LGA OR determination



1  
2  
3 After adjusting for other risk factors, the combined effect of overweight and exceeding IOM  
4 guidelines remained, with an increase in odds of LGA [OR 2.25, 95%CI (1.18, 4.28), p=0.01]  
5 compared to the reference group. The increased odds for LGA in normal weight women who  
6 exceed IOM guidelines was slightly attenuated [OR 1.83 95%CI (0.99, 3.40), p=0.06]. Similar  
7 results were shown for overweight/obese women in the PPG who exceeded IOM guidelines.  
8  
9 There was an increase in odds of LGA for these women in both models adjusted for age only  
10 [OR 2.04 95%CI (1.05, 3.97), p=0.03] and fully adjusted models [OR 2.12 95%CI (1.11, 4.04),  
11 p=0.02] compared with normal weight women who remain within IOM guidelines.  
12  
13  
14  
15  
16  
17  
18  
19  
20

## 21 **DISCUSSION**

22  
23 Although delivery of LGA infants in the TIDM population has been examined in several  
24 epidemiological studies, few studies have examined LGA prevalence over time. In this analysis  
25 of GWG, pre-pregnancy BMI and LGA infant births among mothers with TIDM, we identified  
26 several important overall and GWG- and BMI-specific patterns. Our results suggest no change  
27 in overall LGA prevalence over a 30-year period. However, the proportion of infants born LGA  
28 to women of normal weight who adhered to GWG guidelines was reduced by 17%. This  
29 reduction appeared to be offset by a 15.0% increase in LGA prevalence among  
30 overweight/obese women who exceeded IOM guidelines.  
31  
32  
33  
34  
35  
36  
37  
38  
39

40  
41 Persson et al, 2009 showed that in a contemporary population of women with TIDM,  
42 obstetric and perinatal complications, particularly higher birthweight, remain markedly higher  
43 than the general population<sup>6</sup>. Similarly, the results of our study demonstrate that high weight for  
44 gestational age remains a frequent outcome in pregnancies complicated by TIDM, despite  
45 advancements throughout the years in glucose management and insulin treatment and delivery.  
46  
47 Overall, our study showed LGA prevalence, for both groups, was markedly higher than the  
48 general population, despite observing reductions within select BMI subgroups.  
49  
50  
51  
52  
53  
54  
55  
56  
57  
58  
59  
60

1  
2  
3 Historically, obesity has been associated with T2DM. However, the T1DM population  
4  
5 has shown a significant increase in women entering pregnancy as overweight and obese.  
6  
7 There was a marked increase in the proportion of overweight/obese women in the CSL  
8  
9 compared to the PPG (51.4% vs 20.7%). Women in the CSL belonging to the overweight/obese  
10  
11 subgroup accounted for a greater proportion of those who exceeded IOM guidelines (58.7%)  
12  
13 compared with women in the PPG (41.1%). Overweight/obese women who exceeded IOM  
14  
15 guidelines showed a 15.0% ( $p=0.01$ ) increase in LGA over time. Our results confirm previous  
16  
17 studies that have linked maternal overweight<sup>19 31</sup>, GWG<sup>36</sup> and adverse birth outcomes in the  
18  
19 T1DM population. Despite the improvement, this subgroup remains at the highest risk of  
20  
21 delivering an LGA infant compared to normal weight women who adhered to IOM guidelines.  
22  
23 Interestingly, despite a lower average GWG for women with higher BMI in the CSL compared to  
24  
25 women in the PPG, women with overweight and obesity remained in excess of IOM guidelines  
26  
27 for GWG. On average, overweight and obese CSL women gained 2.6 kg less and 0.30 kg  
28  
29 more, respectively, over total gestation than overweight and obese women in the PPG. These  
30  
31 results suggest that women in the PPG with higher BMI far exceeded IOM guidelines. The  
32  
33 reduction in average GWG for overweight and obese women could help explain the lowered  
34  
35 LGA prevalence over time in this subgroup, 41.2% in the CSL compared to 51.7% in the PPG.  
36  
37 Previous studies in the literature have shown the effect of excessive GWG on risk of LGA,  
38  
39 independent of BMI<sup>14-16 37</sup>. However, the results of our study did not show BMI and adherence  
40  
41 to IOM guidelines as independent predictors of LGA. Women who were not only overweight (or  
42  
43 obese for PPG) but who also exceeded GWG guidelines were at a greater than 2-fold increase  
44  
45 risk of delivering an LGA infant (CSL [OR 2.25, (1.18, 4.28)], PPG [OR 2.12, (1.11, 4.04)]),  
46  
47 compared with women who were normal weight and with GWG within IOM guidelines.  
48  
49 The results of our study point to need of future research that includes additional parameters to  
50  
51 consider when establishing appropriate GWG guidelines specific to this population, such as age  
52  
53 at onset of diabetes (or duration), pre-pregnancy glucose control and diabetes severity upon  
54  
55  
56  
57  
58  
59  
60

1  
2  
3 entering pregnancy. Although in a gestational diabetes (GDM) population, Bowers et al. were  
4 also able to show racial variation in the joint effects of pre-pregnancy obesity, GWG and GDM  
5 on birthweight<sup>38</sup>. Women with T1DM who are planning pregnancies are urged to achieve optimal  
6 weight and clinically acceptable glucose control prior to pregnancy. For women in this  
7 population with unplanned pregnancies, future research is needed that examines more  
8 longitudinal studies that include regular monitoring of glucose and insulin dosage throughout  
9 pregnancy, as well as caloric intake. Not only is GWG of key concern, but gestational timing of  
10 weight gain may also play a role in increased risk of LGA infants. Studies have demonstrated  
11 that first trimester GWG showed the strongest effect on adverse maternal, fetal and childhood  
12 outcomes, including increased neonatal adiposity<sup>39</sup>. All of these factors should be considered  
13 when designing studies that seek to establish new GWG guidelines specific to this population.  
14  
15  
16  
17  
18  
19  
20  
21  
22  
23  
24  
25  
26

27 This study has several limitations. Our analysis was unable to include a comparison of  
28 glucose control between groups, indicated by measures of HbA<sub>1c</sub>, as this data was not available  
29 for CSL participants. Although Secher et. al. showed higher GWG was associated with LGA  
30 outcomes, independent of glucose control<sup>15</sup>, these measurements could potentially account for  
31 the reduction in LGA prevalence among normal weight women who adhered to IOM guidelines  
32 in our study. Secondly, women with T1DM, when compared to women with T2DM, often have  
33 higher HbA<sub>1c</sub> throughout pregnancy due to higher diabetes duration accompanied with greater  
34 variations in glycaemic control<sup>40</sup>. We did not have access to diabetes duration for women in the  
35 CSL. However, it is plausible that diabetes duration was similar for both groups as there was no  
36 significant difference in mean maternal age at delivery between the groups for women with LGA  
37 infants across all levels of IOM adherence, *data not shown*. Further, our study compared  
38 women with T1DM from a local population to women in a nationally representative population.  
39 The differences between the populations, which include regional differences in diet, methods of  
40 treatment, access to quality health care, racial composition and geography limit the  
41  
42  
43  
44  
45  
46  
47  
48  
49  
50  
51  
52  
53  
54  
55  
56  
57  
58  
59  
60

1  
2  
3 generalizability of our results. However, this study serves as an important start for assessing  
4  
5 impact of policy changes on perinatal outcomes like LGA over time. Our sample size for  
6  
7 overweight and obese women who remain within IOM guidelines for PPG limited our power to  
8  
9 robustly test effect modification, and thus no comparisons across time could be made between  
10  
11 groups. However, we were able to examine the role of pre-pregnancy BMI as an effect modifier  
12  
13 in the contemporary CSL cohort. In addition, pre-pregnancy BMI was determined, in part, by  
14  
15 self-reported pre-pregnancy weight in both cohorts, yielding our calculation of pre-pregnancy  
16  
17 BMI subject to recall bias. The ICD-9 codes that were used to identify women in the CSL with  
18  
19 T1DM have not been validated in this study. However, according to Zhang et al., validation  
20  
21 studies were conducted for four key outcomes, including method of delivery, gestational age  
22  
23  $\geq 34$  and  $\geq 37$  weeks and clinical diagnosis of shoulder dystocia<sup>34</sup>, common in LGA deliveries.  
24  
25 Most variables that were reviewed were highly accurate, indicating information provided in the  
26  
27 validation studies was reliable and likely generalizable to the entire database. Lastly, despite  
28  
29 the importance of nephropathy and retinopathy as indicators of diabetes severity, potentially  
30  
31 affecting glucose transport, differing definitions between cohorts prevented variable  
32  
33 harmonization and, therefore, prohibited the adjustment of these factors in our study.  
34  
35 Prevalence of nephropathy according to each group's definition was 18.9% for PPG and 7.8%  
36  
37 for CSL.  
38  
39  
40

41 Despite these limitations, important strengths exist and this study extends beyond prior  
42  
43 studies in several important areas. Our study compared two cohorts of women across a time  
44  
45 period wherein major advancements have been made in the treatment of T1DM while  
46  
47 simultaneously obesity has become a prevalent chronic disease— representing opposing risks  
48  
49 for LGA. Each data set is comprehensive and has unique strengths. For instance, the PPG  
50  
51 cohort includes frequent, repeated observations of women during pregnancy, while the CSL is  
52  
53 large and contemporary.  
54  
55  
56  
57  
58  
59  
60

1  
2  
3 In conclusion, while overall LGA prevalence has remained relatively unchanged over  
4 time, normal weight women with T1DM who adhere to IOM guidelines have experienced a  
5 reduction in LGA prevalence. Women in a more recent T1DM population are starting the  
6 pregnancy period with significantly higher proportions of overweight and obesity than in previous  
7 years. Entering pregnancy as overweight while exceeding IOM guidelines for GWG places  
8 women in this population at the highest risk of LGA. This study demonstrates the importance of  
9 strict adherence to IOM guidelines for GWG, particularly for women who enter pregnancy as  
10 overweight, in order to address reduction of LGA rates in the T1DM population.  
11  
12  
13  
14  
15  
16  
17  
18  
19  
20  
21  
22  
23  
24  
25  
26  
27  
28  
29  
30  
31  
32  
33  
34  
35  
36  
37  
38  
39  
40  
41  
42  
43  
44  
45  
46  
47  
48  
49  
50  
51  
52  
53  
54  
55  
56  
57  
58  
59  
60

**Contributors**

Study concept and design: KLM, JCK; acquisition of data: JCK; statistical analysis: KLM; interpretation of data: KLM, JCK, KB, CLJ, RD, LMD; drafting of the manuscript: KLM; critical revision of the manuscript for important intellectual content: KLM, JCK, KB, CLJ; administrative, technical, and material support: CLJ, JCK. All authors approved of the version of the manuscript to be published.

**Funding:** This work was supported, in part, by the University of Cincinnati, Molecular Epidemiology in Children's Environmental Health Training Grant [T32-ES10957], NIH grant Diabetes in Pregnancy Program Project Grant [HD11725], the Consortium on Safe Labor was funded by the *Eunice Kennedy Shriver* Intramural Research Program of the NICHD [Contract No. HHSN267200603425C] and the Intramural Research Training Program of the National Institute for Environmental Health Sciences [ES16003]. This work was also funded, in part, by the Intramural Program at the NIH, National Institute of Environmental Health Sciences [Z1AES103325-01].

**Competing interests** None declared.

**Patient consent** Yes.

**Ethics approval** IRB approval was obtained from Cincinnati Children's Hospital Medical center as well as the University of Cincinnati prior to the secondary analysis of the Diabetes in Pregnancy Program Project (PPG) and the Consortium on Safe Labor (CLS) data.

**Data sharing statement** No additional data are available.

**REFERENCES**

1. Evers IM, de Valk HW, Mol BW, et al. Macrosomia despite good glycaemic control in Type I diabetic pregnancy; results of a nationwide study in The Netherlands. *Diabetologia* 2002;45(11):1484-9. doi: 10.1007/s00125-002-0958-7 [published Online First: 2002/11/19].
2. Catalano PM, Hauguel-De Mouzon S. Is it time to revisit the Pedersen hypothesis in the face of the obesity epidemic ? *Am J Obstet Gynecol* 2011;204(6):479-87. doi: 10.1016/j.ajog.2010.11.039
3. Persson B, Hanson U. Fetal size at birth in relation to quality of blood glucose control in pregnancies complicated by pregestational diabetes mellitus. *Br J Obstet Gynaecol* 1996;103(5):427-33. [published Online First: 1996/05/01].
4. Kerssen A, de Valk HW, Visser GH. Increased second trimester maternal glucose levels are related to extremely large-for-gestational-age infants in women with type 1 diabetes. *Diabetes Care* 2007;30(5):1069-74. doi: 10.2337/dc05-1985 [published Online First: 2007/05/01].
5. Scifres CM, Feghali MN, Althouse AD, et al. Effect of excess gestational weight gain on pregnancy outcomes in women with type 1 diabetes. *Obstet Gynecol* 2014;123(6):1295-302. doi: 10.1097/aog.0000000000000271 [published Online First: 2014/05/09].
6. Persson M, Norman M, Hanson U. Obstetric and perinatal outcomes in type 1 diabetic pregnancies: A large, population-based study. *Diabetes Care* 2009;32(11):2005-9. doi: 10.2337/dc09-0656 [published Online First: 2009/08/14].
7. Kim SY, Kotelchuck M, Wilson HG, et al. Prevalence of Adverse Pregnancy Outcomes, by Maternal Diabetes Status at First and Second Deliveries, Massachusetts, 1998-2007. *Prev Chronic Dis* 2015;12:E218. doi: 10.5888/pcd12.150362 [published Online First: 2015/12/15].
8. Sjaarda LA, Albert PS, Mumford SL, et al. Customized large-for-gestational-age birthweight at term and the association with adverse perinatal outcomes. *Am J Obstet Gynecol*

- 1  
2  
3 2014;210(1):63.e1-63.e11. doi: 10.1016/j.ajog.2013.09.006 [published Online First:  
4 2013/09/17].  
5  
6
- 7 9. Stotland NE, Caughey AB, Breed EM, et al. Risk factors and obstetric complications  
8 associated with macrosomia. *Int J Gynaecol Obstet* 2004;87(3):220-6. doi:  
9 10.1016/j.ijgo.2004.08.010 [published Online First: 2004/11/19].  
10  
11
- 12 10. Surkan PJ, Hsieh CC, Johansson AL, et al. Reasons for increasing trends in large for  
13 gestational age births. *Obstet Gynecol* 2004;104(4):720-6. doi:  
14 10.1097/01.AOG.0000141442.59573.cd [published Online First: 2004/10/02].  
15  
16
- 17 11. Cundy T, Gamble G, Manuel A, et al. Determinants of birth-weight in women with  
18 established and gestational diabetes. *Aust N Z J Obstet Gynaecol* 1993;33(3):249-54.  
19 [published Online First: 1993/08/01].  
20  
21
- 22 12. Wilcox MA, Chang AM, Johnson IR. The effects of parity on birthweight using successive  
23 pregnancies. *Acta Obstet Gynecol Scand* 1996;75(5):459-3. [published Online First:  
24 1996/05/01].  
25  
26
- 27 13. Heerwagen MJ, Miller MR, Barbour LA, et al. Maternal obesity and fetal metabolic  
28 programming: a fertile epigenetic soil. *Am J Physiol Regul Integr Comp Physiol*  
29 2010;299(3):R711-22. doi: 10.1152/ajpregu.00310.2010 [published Online First:  
30 2010/07/16].  
31  
32
- 33 14. Starling AP, Brinton JT, Glueck DH, et al. Associations of maternal BMI and gestational  
34 weight gain with neonatal adiposity in the Healthy Start study. *Am J Clin Nutr* 2015 doi:  
35 10.3945/ajcn.114.094946  
36  
37
- 38 15. Secher AL, Parellada CB, Ringholm L, et al. Higher gestational weight gain is associated  
39 with increasing offspring birth weight independent of maternal glycemic control in women  
40 with type 1 diabetes. *Diabetes Care* 2014;37(10):2677-84. doi: 10.2337/dc14-0896  
41 [published Online First: 2014/09/25].  
42  
43  
44  
45  
46  
47  
48  
49  
50  
51  
52  
53  
54  
55  
56  
57  
58  
59  
60



16. Kim SY, Sharma AJ, Sappenfield W, et al. Preventing large birth size in women with preexisting diabetes mellitus: The benefit of appropriate gestational weight gain. *Prev Med* 2016;91:164-68. doi: 10.1016/j.ypmed.2016.08.026 [published Online First: 2016/08/20].
17. Ehrenberg HM, Mercer BM, Catalano PM. The influence of obesity and diabetes on the prevalence of macrosomia. *Am J Obstet Gynecol* 2004;191(3):964-8. doi: 10.1016/j.ajog.2004.05.052 [published Online First: 2004/10/07].
18. Sacks DA, Liu AI, Wolde-Tsadik G, et al. What proportion of birth weight is attributable to maternal glucose among infants of diabetic women? *Am J Obstet Gynecol* 2006;194(2):501-7. doi: 10.1016/j.ajog.2005.07.042 [published Online First: 2006/02/07].
19. Morrens A, Verhaeghe J, Vanhole C, et al. Risk factors for large-for-gestational age infants in pregnant women with type 1 diabetes. *BMC Pregnancy Childbirth* 2016;16(1):162. doi: 10.1186/s12884-016-0958-0 [published Online First: 2016/07/17].
20. Hill DJ, Prapavessis H, Shoemaker JK, et al. Relationship between Birth Weight and Metabolic Status in Obese Adolescents. *ISRN Obesity* 2013;2013:8. doi: 10.1155/2013/490923
21. Schellong K, Schulz S, Harder T, et al. Birth weight and long-term overweight risk: systematic review and a meta-analysis including 643,902 persons from 66 studies and 26 countries globally. *PLoS One* 2012;7(10):e47776. doi: 10.1371/journal.pone.0047776 [published Online First: 2012/10/20].
22. Hediger ML, Overpeck MD, McGlynn A, et al. Growth and fatness at three to six years of age of children born small- or large-for-gestational age. *Pediatrics* 1999;104(3):e33. [published Online First: 1999/09/02].
23. Zhang Z, Kris-Etherton PM, Hartman TJ. Birth weight and risk factors for cardiovascular disease and type 2 diabetes in US children and adolescents: 10 year results from NHANES. *Matern Child Health J* 2014;18(6):1423-32. doi: 10.1007/s10995-013-1382-y [published Online First: 2013/11/19].

- 1  
2  
3 24. Boney CM, Verma A, Tucker R, et al. Metabolic syndrome in childhood: association with  
4 birth weight, maternal obesity, and gestational diabetes mellitus. *Pediatrics*  
5 2005;115(3):e290-6. doi: 10.1542/peds.2004-1808 [published Online First: 2005/03/03].  
6  
7  
8  
9 25. Branum AM, Kirmeyer SE, Gregory EC. Prepregnancy Body Mass Index by Maternal  
10 Characteristics and State: Data From the Birth Certificate, 2014. *Natl Vital Stat Rep*  
11 2016;65(6):1-11. [published Online First: 2016/08/11].  
12  
13  
14  
15 26. Chu SY, Callaghan WM, Bish CL, et al. Gestational weight gain by body mass index among  
16 US women delivering live births, 2004-2005: fueling future obesity. *Am J Obstet Gynecol*  
17 2009;200(3):271.e1-7. doi: 10.1016/j.ajog.2008.09.879 [published Online First: 2009/01/13].  
18  
19  
20  
21 27. Mamun AA, O'Callaghan M, Callaway L, et al. Associations of gestational weight gain with  
22 offspring body mass index and blood pressure at 21 years of age: evidence from a birth  
23 cohort study. *Circulation* 2009;119(13):1720-7. doi: 10.1161/circulationaha.108.813436  
24  
25  
26  
27 [published Online First: 2009/03/25].  
28  
29  
30 28. Institute of M, National Research Council Committee to Reexamine IOMPWG. The National  
31 Academies Collection: Reports funded by National Institutes of Health. In: Rasmussen KM,  
32 Yaktine AL, eds. *Weight Gain During Pregnancy: Reexamining the Guidelines*. Washington  
33 (DC): National Academies Press (US)  
34  
35  
36  
37  
38  
39  
40 National Academy of Sciences. 2009.  
41  
42 29. Catalano PM, Presley L, Minium J, et al. Fetuses of obese mothers develop insulin  
43 resistance in utero. *Diabetes Care* 2009;32(6):1076-80. doi: 10.2337/dc08-2077 [published  
44 Online First: 2009/05/23].  
45  
46  
47  
48 30. Arshad R, Karim N, Ara Hasan J. Effects of insulin on placental, fetal and maternal  
49 outcomes in gestational diabetes mellitus. *Pakistan Journal of Medical Sciences*  
50 2014;30(2):240-44.  
51  
52  
53  
54  
55  
56  
57  
58  
59  
60

- 1  
2  
3 31. Persson M, Pasupathy D, Hanson U, et al. Pre-pregnancy body mass index and the risk of  
4 adverse outcome in type 1 diabetic pregnancies: a population-based cohort study. *BMJ*  
5 *Open* 2012;2(1) doi: 10.1136/bmjopen-2011-000601  
6  
7  
8  
9 32. Rosenberg TJ, Garbers S, Lipkind H, et al. Maternal obesity and diabetes as risk factors for  
10 adverse pregnancy outcomes: differences among 4 racial/ethnic groups. *Am J Public Health*  
11 2005;95(9):1545-51. doi: 10.2105/ajph.2005.065680 [published Online First: 2005/08/25].  
12  
13  
14  
15 33. Miodovnik M, Mimouni F, Dignan PS, et al. Major malformations in infants of IDDM women.  
16 Vasculopathy and early first-trimester poor glycemic control. *Diabetes Care* 1988;11(9):713-  
17 8. [published Online First: 1988/10/01].  
18  
19  
20  
21 34. Zhang J, Troendle J, Reddy UM, et al. Contemporary cesarean delivery practice in the  
22 United States. *Am J Obstet Gynecol* 2010;203(4):326.e1-26.e10. doi:  
23 10.1016/j.ajog.2010.06.058 [published Online First: 2010/08/17].  
24  
25  
26  
27 35. Lubchenco LO, Hansman C, Dressler M, et al. Intrauterine Growth as Estimated from  
28 Liveborn Birth-Weight Data at 24 to 42 Weeks of Gestation. *Pediatrics* 1963;32:793-800.  
29 [published Online First: 1963/11/01].  
30  
31  
32  
33 36. Egan AM, Dennedy MC, Al-Ramli W, et al. ATLANTIC-DIP: excessive gestational weight  
34 gain and pregnancy outcomes in women with gestational or pregestational diabetes mellitus.  
35 *J Clin Endocrinol Metab* 2014;99(1):212-9. doi: 10.1210/jc.2013-2684 [published Online  
36 First: 2013/11/05].  
37  
38  
39  
40 37. Nohr EA, Vaeth M, Baker JL, et al. Combined associations of prepregnancy body mass  
41 index and gestational weight gain with the outcome of pregnancy. *Am J Clin Nutr*  
42 2008;87(6):1750-9. [published Online First: 2008/06/11].  
43  
44  
45  
46 38. Bowers K, Laughon SK, Kiely M, et al. Gestational diabetes, pre-pregnancy obesity and  
47 pregnancy weight gain in relation to excess fetal growth: variations by race/ethnicity.  
48 *Diabetologia* 2013;56(6):1263-71. doi: 10.1007/s00125-013-2881-5 [published Online First:  
49 2013/04/11].  
50  
51  
52  
53  
54  
55  
56  
57  
58  
59  
60

- 1  
2  
3 39. Josefson JL, Simons H, Zeiss DM, et al. Excessive gestational weight gain in the first  
4  
5 trimester among women with normal glucose tolerance and resulting neonatal adiposity. *J*  
6  
7 *Perinatol* 2016;36(12):1034-38. doi: 10.1038/jp.2016.145 [published Online First:  
8  
9 2016/09/02].  
10  
11 40. Balsells M, Garcia-Patterson A, Gich I, et al. Maternal and fetal outcome in women with type  
12  
13 2 versus type 1 diabetes mellitus: a systematic review and metaanalysis. *J Clin Endocrinol*  
14  
15 *Metab* 2009;94(11):4284-91. doi: 10.1210/jc.2009-1231 [published Online First: 2009/10/08].  
16  
17  
18  
19  
20  
21  
22  
23  
24  
25  
26  
27  
28  
29  
30  
31  
32  
33  
34  
35  
36  
37  
38  
39  
40  
41  
42  
43  
44  
45  
46  
47  
48  
49  
50  
51  
52  
53  
54  
55  
56  
57  
58  
59  
60

**Table S1. Maternal characteristics of women in PPG (1978-1993) and CSL (2002-2008) by adherence to IOM recommendations for gestational weight gain**

| Characteristic                                                   | PPG<br>n=333 |            |            | p-value | CSL<br>n=358 |            |            | p-value |
|------------------------------------------------------------------|--------------|------------|------------|---------|--------------|------------|------------|---------|
|                                                                  | n=74         | n=118      | n=141      |         | n=62         | n=95       | n=201      |         |
| Maternal age (at delivery), years                                | 25.6 ± 5.2   | 26.7 ± 4.8 | 26.5 ± 5.1 | 0.33    | 28.2 ± 6.0   | 27.7 ± 5.9 | 27.3 ± 6.1 | 0.53    |
| Married, yes <sup>a</sup>                                        | 41 (22.1)    | 89 (77.4)  | 94 (69.1)  | 0.02    | 39 (62.9)    | 56 (59.0)  | 122 (60.7) | 0.88    |
| Race                                                             |              |            |            | 0.15    |              |            |            | 0.02    |
| White                                                            | 56 (75.7)    | 103 (87.3) | 123 (87.2) |         | 30 (48.4)    | 57 (60.0)  | 138 (68.7) |         |
| Black                                                            | 17 (23.0)    | 13 (11.0)  | 17 (12.1)  |         | 20 (32.3)    | 18 (19.0)  | 31 (15.4)  |         |
| Other                                                            | 1 (1.3)      | 2 (1.7)    | 1 (0.7)    |         | 12 (19.3)    | 20 (21.1)  | 32 (15.9)  |         |
| Nulliparous, yes                                                 | 43 (58.1)    | 59 (50.0)  | 64 (45.4)  | 0.21    | 26 (41.9)    | 50 (52.6)  | 107 (53.2) | 0.28    |
| Pre-pregnancy BMI (kg/m <sup>2</sup> )                           | 21.9 ± 2.9   | 22.0 ± 2.7 | 24.4 ± 3.6 | <.0001  | 27.2 ± 7.2   | 26.3 ± 6.6 | 27.0 ± 5.7 | 0.62    |
| Pre-pregnancy BMI category                                       |              |            |            | <.0001  |              |            |            | 0.007   |
| Underweight (BMI<18.5 kg/m <sup>2</sup> )                        | 4 (5.4)      | 7 (5.9)    | 0 (0.0)    |         | 2 (3.2)      | 3 (3.2)    | 1 (0.5)    |         |
| Normal (18.5 kg/m <sup>2</sup> ≤BMI<25.0 kg/m <sup>2</sup> )     | 67 (90.5)    | 103 (87.3) | 83 (58.9)  |         | 33 (53.2)    | 53 (55.8)  | 82 (48.8)  |         |
| Overweight (25.0 kg/m <sup>2</sup> ≤BMI<30.0 kg/m <sup>2</sup> ) | 1 (1.4)      | 7 (5.9)    | 48 (34.0)  |         | 12 (19.4)    | 15 (15.8)  | 70 (34.8)  |         |
| Obese (BMI≥30.0 kg/m <sup>2</sup> )                              | 2 (2.7)      | 1 (0.9)    | 10 (7.1)   |         | 15 (24.2)    | 24 (25.3)  | 48 (23.9)  |         |
| Pre-pregnancy Overweight/Obese (BMI≥25.0 kg/m <sup>2</sup> )     | 3 (4.1)      | 8 (6.8)    | 58 (41.1)  | <.0001  | 27 (43.6)    | 39 (41.1)  | 118 (58.7) | 0.007   |
| Gestational Weight Gain (kg)                                     | 7.2 ± 3.9    | 13.4 ± 1.8 | 18.9 ± 4.0 | <.0001  | 4.9 ± 5.3    | 11.6 ± 3.0 | 18.8 ± 5.7 | <.0001  |
| Preeclampsia, yes                                                | 13 (17.6)    | 17 (14.4)  | 20 (14.2)  | 0.78    | 10 (16.1)    | 9 (9.5)    | 36 (17.9)  | 0.17    |
| Previous cesarean section, yes <sup>a</sup>                      | 16 (21.9)    | 40 (33.9)  | 49 (34.8)  | 0.13    | 15 (25.9)    | 22 (25.3)  | 49 (25.4)  | 1.00    |
| Cesarean section, yes                                            | 50 (67.6)    | 84 (71.2)  | 99 (70.2)  | 0.86    | 37 (59.7)    | 59 (62.1)  | 143 (71.1) | 0.13    |
| Large-for-gestational age                                        | 22 (29.7)    | 44 (37.3)  | 68 (48.2)  | 0.02    | 15 (24.2)    | 30 (31.6)  | 86 (42.8)  | 0.01    |

Mean ± SD are shown for all continuous variables and n(%) are shown for categorical variables

LGA was defined as infants with a birthweight >90th percentile, adjusted for age, sex and race.

<sup>a</sup> PPG: Marital status missing for 11 women; CSL: Previous cesarean section missing for 20 women.

**Table S2. Mean ± SD of reproductive characteristics for PPG (1978-1993) and CSL (2002-2008) stratified by BMI**

| n                                | PPG<br>n=333 |             |             |            | CSL<br>n=358 |            |            |            |
|----------------------------------|--------------|-------------|-------------|------------|--------------|------------|------------|------------|
|                                  | 11           | 253         | 56          | 13         | 6            | 168        | 97         | 87         |
|                                  | Underweight  | Normal      | Overweight  | Obese      | Underweight  | Normal     | Overweight | Obese      |
| Maternal age at delivery (years) | 24.4 ± 5.2   | 26.5 ± 4.8  | 25.9 ± 5.9  | 29.3 ± 4.9 | 28.8 ± 4.1   | 27.4 ± 5.9 | 26.6 ± 6.3 | 28.8 ± 5.8 |
| Birthweight (g)                  | 2994 ± 945   | 3269 ± 796  | 3390 ± 767  | 3293 ± 903 | 2942 ± 666   | 3264 ± 796 | 3277 ± 823 | 3149 ± 910 |
| Gestational age (weeks)          | 35.7 ± 3.7   | 36.9 ± 2.47 | 37.4 ± 2.17 | 37.4 ± 1.5 | 35.7 ± 5.4   | 36.3 ± 2.6 | 36.0 ± 2.3 | 36.0 ± 3.1 |
| Gestational Weight Gain (kg)     | 11.5 ± 5.0   | 14.0 ± 5.5  | 17.1 ± 5.4  | 10.7 ± 5.4 | 11.3 ± 8.6   | 16.4 ± 6.4 | 14.5 ± 6.7 | 11.0 ± 8.5 |
| Prepregnancy BMI                 | 17.3 ± 0.7   | 21.9 ± 1.6  | 26.6 ± 1.35 | 33.6 ± 3.7 | 17.5 ± 1.0   | 23.4 ± 1.7 | 27.2 ± 1.5 | 35.8 ± 5.3 |

Mean ± SD are shown for all continuous variables

BMI=body mass index (kg/m<sup>2</sup>); PPG=Diabetes in Pregnancy Program Project; CSL=Consortium on Safe Labor.

BMI was defined as: underweight (BMI<18.5 kg/m<sup>2</sup>); normal (18.5 kg/m<sup>2</sup>≤BMI<25.0 kg/m<sup>2</sup>); overweight (25.0 kg/m<sup>2</sup>≤BMI<30.0 kg/m<sup>2</sup>); obese (BMI≥30.0 kg/m<sup>2</sup>).

## STROBE Statement—checklist of items that should be included in reports of observational studies

|                           | Item No | Recommendation                                                                                                                                                                                                                                                                                                                                                                                                                                                                                                                                                                                                                                                                                                                        |
|---------------------------|---------|---------------------------------------------------------------------------------------------------------------------------------------------------------------------------------------------------------------------------------------------------------------------------------------------------------------------------------------------------------------------------------------------------------------------------------------------------------------------------------------------------------------------------------------------------------------------------------------------------------------------------------------------------------------------------------------------------------------------------------------|
| <b>Title and abstract</b> | 1       | (a) Indicate the study's design with a commonly used term in the title or the abstract [ <b>Within the title page 1 and design section of the abstract page 2</b> ]<br>(b) Provide in the abstract an informative and balanced summary of what was done and what was found [ <b>Results section of abstract page 2</b> ]                                                                                                                                                                                                                                                                                                                                                                                                              |
| <b>Introduction</b>       |         |                                                                                                                                                                                                                                                                                                                                                                                                                                                                                                                                                                                                                                                                                                                                       |
| Background/rationale      | 2       | Explain the scientific background and rationale for the investigation being reported [ <b>page 5</b> ]                                                                                                                                                                                                                                                                                                                                                                                                                                                                                                                                                                                                                                |
| Objectives                | 3       | State specific objectives, including any prespecified hypotheses [ <b>page 6</b> ]                                                                                                                                                                                                                                                                                                                                                                                                                                                                                                                                                                                                                                                    |
| <b>Methods</b>            |         |                                                                                                                                                                                                                                                                                                                                                                                                                                                                                                                                                                                                                                                                                                                                       |
| Study design              | 4       | Present key elements of study design early in the paper [ <b>Methods pages 6-7</b> ]                                                                                                                                                                                                                                                                                                                                                                                                                                                                                                                                                                                                                                                  |
| Setting                   | 5       | Describe the setting, locations, and relevant dates, including periods of recruitment, exposure, follow-up, and data collection [ <b>Methods pages 6-7</b> ]                                                                                                                                                                                                                                                                                                                                                                                                                                                                                                                                                                          |
| Participants              | 6       | (a) <i>Cohort study</i> —Give the eligibility criteria, and the sources and methods of selection of participants. Describe methods of follow-up [ ]<br><i>Case-control study</i> —Give the eligibility criteria, and the sources and methods of case ascertainment and control selection. Give the rationale for the choice of cases and controls [ ]<br><i>Cross-sectional study</i> —Give the eligibility criteria, and the sources and methods of selection of participants [ <b>pages 6-7</b> ]<br>(b) <i>Cohort study</i> —For matched studies, give matching criteria and number of exposed and unexposed [ ]<br><i>Case-control study</i> —For matched studies, give matching criteria and the number of controls per case [ ] |
| Variables                 | 7       | Clearly define all outcomes, exposures, predictors, potential confounders, and effect modifiers. Give diagnostic criteria, if applicable [ <b>pages 8-9</b> ]                                                                                                                                                                                                                                                                                                                                                                                                                                                                                                                                                                         |
| Data sources/ measurement | 8*      | For each variable of interest, give sources of data and details of methods of assessment (measurement). Describe comparability of assessment methods if there is more than one group [ <b>pages 8-9</b> ]                                                                                                                                                                                                                                                                                                                                                                                                                                                                                                                             |
| Bias                      | 9       | Describe any efforts to address potential sources of bias [ <b>page 8</b> ]                                                                                                                                                                                                                                                                                                                                                                                                                                                                                                                                                                                                                                                           |
| Study size                | 10      | Explain how the study size was arrived at [ <b>pages 6-7</b> ]                                                                                                                                                                                                                                                                                                                                                                                                                                                                                                                                                                                                                                                                        |
| Quantitative variables    | 11      | Explain how quantitative variables were handled in the analyses. If applicable, describe which groupings were chosen and why [ <b>pages 8-9</b> ]                                                                                                                                                                                                                                                                                                                                                                                                                                                                                                                                                                                     |
| Statistical methods       | 12      | (a) Describe all statistical methods, including those used to control for confounding [ <b>pages 8-10</b> ]<br>(b) Describe any methods used to examine subgroups and interactions [ <b>page 9</b> ]<br>(c) Explain how missing data were addressed [ <b>N/A</b> ]<br>(d) <i>Cohort study</i> —If applicable, explain how loss to follow-up was addressed [ ]<br><i>Case-control study</i> —If applicable, explain how matching of cases and controls was addressed [ ]                                                                                                                                                                                                                                                               |

|                          |     |                                                                                                                                                                                                                                                                                                                                                                                                                                     |
|--------------------------|-----|-------------------------------------------------------------------------------------------------------------------------------------------------------------------------------------------------------------------------------------------------------------------------------------------------------------------------------------------------------------------------------------------------------------------------------------|
|                          |     | <i>Cross-sectional study</i> —If applicable, describe analytical methods taking account of sampling strategy [N/A]                                                                                                                                                                                                                                                                                                                  |
|                          |     | (e) Describe any sensitivity analyses [N/A]                                                                                                                                                                                                                                                                                                                                                                                         |
| <b>Results</b>           |     |                                                                                                                                                                                                                                                                                                                                                                                                                                     |
| Participants             | 13* | (a) Report numbers of individuals at each stage of study—eg numbers potentially eligible, examined for eligibility, confirmed eligible, included in the study, completing follow-up, and analysed [page 11 table 1]<br>(b) Give reasons for non-participation at each stage [N/A]<br>(c) Consider use of a flow diagram [N/A]                                                                                                       |
| Descriptive data         | 14* | (a) Give characteristics of study participants (eg demographic, clinical, social) and information on exposures and potential confounders [pages 10-11 and table 1]<br>(b) Indicate number of participants with missing data for each variable of interest [table 1]<br>(c) <i>Cohort study</i> —Summarise follow-up time (eg, average and total amount) [ ]                                                                         |
| Outcome data             | 15* | <i>Cohort study</i> —Report numbers of outcome events or summary measures over time [ ]<br><i>Case-control study</i> —Report numbers in each exposure category, or summary measures of exposure [ ]<br><i>Cross-sectional study</i> —Report numbers of outcome events or summary measures [tables 2 and 3]                                                                                                                          |
| Main results             | 16  | (a) Give unadjusted estimates and, if applicable, confounder-adjusted estimates and their precision (eg, 95% confidence interval). Make clear which confounders were adjusted for and why they were included [table 4]<br>(b) Report category boundaries when continuous variables were categorized [N/A]<br>(c) If relevant, consider translating estimates of relative risk into absolute risk for a meaningful time period [N/A] |
| Other analyses           | 17  | Report other analyses done—eg analyses of subgroups and interactions, and sensitivity analyses [table 5]                                                                                                                                                                                                                                                                                                                            |
| <b>Discussion</b>        |     |                                                                                                                                                                                                                                                                                                                                                                                                                                     |
| Key results              | 18  | Summarise key results with reference to study objectives [page 16]                                                                                                                                                                                                                                                                                                                                                                  |
| Limitations              | 19  | Discuss limitations of the study, taking into account sources of potential bias or imprecision. Discuss both direction and magnitude of any potential bias [pages 17-18]                                                                                                                                                                                                                                                            |
| Interpretation           | 20  | Give a cautious overall interpretation of results considering objectives, limitations, multiplicity of analyses, results from similar studies, and other relevant evidence [pages 18-19]                                                                                                                                                                                                                                            |
| Generalisability         | 21  | Discuss the generalisability (external validity) of the study results [page 18-19]                                                                                                                                                                                                                                                                                                                                                  |
| <b>Other information</b> |     |                                                                                                                                                                                                                                                                                                                                                                                                                                     |
| Funding                  | 22  | Give the source of funding and the role of the funders for the present study and, if applicable, for the original study on which the present article is based [page 21]                                                                                                                                                                                                                                                             |



1  
2 \*Give information separately for cases and controls in case-control studies and, if applicable, for exposed and  
3 unexposed groups in cohort and cross-sectional studies.  
4

5 **Note:** An Explanation and Elaboration article discusses each checklist item and gives methodological background and  
6 published examples of transparent reporting. The STROBE checklist is best used in conjunction with this article (freely  
7 available on the Web sites of PLoS Medicine at <http://www.plosmedicine.org/>, Annals of Internal Medicine at  
8 <http://www.annals.org/>, and Epidemiology at <http://www.epidem.com/>). Information on the STROBE Initiative is  
9 available at [www.strobe-statement.org](http://www.strobe-statement.org).  
10  
11  
12  
13  
14  
15  
16  
17  
18  
19  
20  
21  
22  
23  
24  
25  
26  
27  
28  
29  
30  
31  
32  
33  
34  
35  
36  
37  
38  
39  
40  
41  
42  
43  
44  
45  
46  
47  
48  
49  
50  
51  
52  
53  
54  
55  
56  
57  
58  
59  
60
