# Supplementary material for: Impact of gestational weight gain and prepregnancy body mass index on the prevalence of large-for-gestational age infants in two cohorts of women with type 1 insulin-dependent diabetes: a cross-sectional population study
Source: PubMed Central journal article supplement — BMJ Open. 2018 Mar 30;8(3):e019617. doi: 10.1136/bmjopen-2017-019617 (PMC5884363; doi:10.1136/bmjopen-2017-019617), 2018-03-30
Supplement: bmjopen-2017-019617supp001.pdf [file bmjopen-2017-019617supp001.pdf]

**Table S1. Maternal characteristics of women in PPG (1978-1993) and CSL (2002-2008) by adherence to IOM recommendations for gestational weight gain**

| Characteristic                                                   | PPG<br>n=333                   |                     |                   | p-value | CSL<br>n=358      |                    |                   | p-value |
|------------------------------------------------------------------|--------------------------------|---------------------|-------------------|---------|-------------------|--------------------|-------------------|---------|
|                                                                  | n=74<br>IOM under <sup>1</sup> | n=118<br>IOM within | n=141<br>IOM over |         | n=62<br>IOM under | n=95<br>IOM within | n=201<br>IOM over |         |
| Maternal age (at delivery), years                                | 25.6 ± 5.2                     | 26.7 ± 4.8          | 26.5 ± 5.1        | 0.33    | 28.2 ± 6.0        | 27.7 ± 5.9         | 27.3 ± 6.1        | 0.53    |
| Married, yes <sup>a</sup>                                        | 41 (22.1)                      | 89 (77.4)           | 94 (69.1)         | 0.02    | 39 (62.9)         | 56 (59.0)          | 122 (60.7)        | 0.88    |
| Race                                                             |                                |                     |                   | 0.15    |                   |                    |                   | 0.02    |
| White                                                            | 56 (75.7)                      | 103 (87.3)          | 123 (87.2)        |         | 30 (48.4)         | 57 (60.0)          | 138 (68.7)        |         |
| Black                                                            | 17 (23.0)                      | 13 (11.0)           | 17 (12.1)         |         | 20 (32.3)         | 18 (19.0)          | 31 (15.4)         |         |
| Other                                                            | 1 (1.3)                        | 2 (1.7)             | 1 (0.7)           |         | 12 (19.3)         | 20 (21.1)          | 32 (15.9)         |         |
| Nulliparous, yes                                                 | 43 (58.1)                      | 59 (50.0)           | 64 (45.4)         | 0.21    | 26 (41.9)         | 50 (52.6)          | 107 (53.2)        | 0.28    |
| Pre-pregnancy BMI (kg/m <sup>2</sup> )                           | 21.9 ± 2.9                     | 22.0 ± 2.7          | 24.4 ± 3.6        | <.0001  | 27.2 ± 7.2        | 26.3 ± 6.6         | 27.0 ± 5.7        | 0.62    |
| Pre-pregnancy BMI category                                       |                                |                     |                   | <.0001  |                   |                    |                   | 0.007   |
| Underweight (BMI<18.5 kg/m <sup>2</sup> )                        | 4 (5.4)                        | 7 (5.9)             | 0 (0.0)           |         | 2 (3.2)           | 3 (3.2)            | 1 (0.5)           |         |
| Normal (18.5 kg/m <sup>2</sup> ≤BMI<25.0 kg/m <sup>2</sup> )     | 67 (90.5)                      | 103 (87.3)          | 83 (58.9)         |         | 33 (53.2)         | 53 (55.8)          | 82 (48.8)         |         |
| Overweight (25.0 kg/m <sup>2</sup> ≤BMI<30.0 kg/m <sup>2</sup> ) | 1 (1.4)                        | 7 (5.9)             | 48 (34.0)         |         | 12 (19.4)         | 15 (15.8)          | 70 (34.8)         |         |
| Obese (BMI≥30.0 kg/m <sup>2</sup> )                              | 2 (2.7)                        | 1 (0.9)             | 10 (7.1)          |         | 15 (24.2)         | 24 (25.3)          | 48 (23.9)         |         |
| Pre-pregnancy Overweight/Obese (BMI≥25.0 kg/m <sup>2</sup> )     | 3 (4.1)                        | 8 (6.8)             | 58 (41.1)         | <.0001  | 27 (43.6)         | 39 (41.1)          | 118 (58.7)        | 0.007   |
| Gestational Weight Gain (kg)                                     | 7.2 ± 3.9                      | 13.4 ± 1.8          | 18.9 ± 4.0        | <.0001  | 4.9 ± 5.3         | 11.6 ± 3.0         | 18.8 ± 5.7        | <.0001  |
| Preeclampsia, yes                                                | 13 (17.6)                      | 17 (14.4)           | 20 (14.2)         | 0.78    | 10 (16.1)         | 9 (9.5)            | 36 (17.9)         | 0.17    |
| Previous cesarean section, yes <sup>a</sup>                      | 16 (21.9)                      | 40 (33.9)           | 49 (34.8)         | 0.13    | 15 (25.9)         | 22 (25.3)          | 49 (25.4)         | 1.00    |
| Cesarean section, yes                                            | 50 (67.6)                      | 84 (71.2)           | 99 (70.2)         | 0.86    | 37 (59.7)         | 59 (62.1)          | 143 (71.1)        | 0.13    |
| Large-for-gestational age                                        | 22 (29.7)                      | 44 (37.3)           | 68 (48.2)         | 0.02    | 15 (24.2)         | 30 (31.6)          | 86 (42.8)         | 0.01    |

Mean ± SD are shown for all continuous variables and n(%) are shown for categorical variables

LGA was defined as infants with a birthweight >90th percentile, adjusted for age, sex and race.

<sup>a</sup> PPG: Marital status missing for 11 women; CSL: Previous cesarean section missing for 20 women.
