# Supplementary material for: Impact of gestational weight gain and prepregnancy body mass index on the prevalence of large-for-gestational age infants in two cohorts of women with type 1 insulin-dependent diabetes: a cross-sectional population study
Source: PubMed Central journal article supplement — BMJ Open. 2018 Mar 30;8(3):e019617. doi: 10.1136/bmjopen-2017-019617 (PMC5884363; doi:10.1136/bmjopen-2017-019617), 2018-03-30
Supplement: bmjopen-2017-019617supp002.pdf [file bmjopen-2017-019617supp002.pdf]

**Table S2. Mean ± SD of reproductive characteristics for PPG (1978-1993) and CSL (2002-2008) stratified by BMI**

| n                                | PPG<br>n=333 |             |             |            | CSL<br>n=358 |            |            |            |
|----------------------------------|--------------|-------------|-------------|------------|--------------|------------|------------|------------|
|                                  | 11           | 253         | 56          | 13         | 6            | 168        | 97         | 87         |
|                                  | Underweight  | Normal      | Overweight  | Obese      | Underweight  | Normal     | Overweight | Obese      |
| Maternal age at delivery (years) | 24.4 ± 5.2   | 26.5 ± 4.8  | 25.9 ± 5.9  | 29.3 ± 4.9 | 28.8 ± 4.1   | 27.4 ± 5.9 | 26.6 ± 6.3 | 28.8 ± 5.8 |
| Birthweight (g)                  | 2994 ± 945   | 3269 ± 796  | 3390 ± 767  | 3293 ± 903 | 2942 ± 666   | 3264 ± 796 | 3277 ± 823 | 3149 ± 910 |
| Gestational age (weeks)          | 35.7 ± 3.7   | 36.9 ± 2.47 | 37.4 ± 2.17 | 37.4 ± 1.5 | 35.7 ± 5.4   | 36.3 ± 2.6 | 36.0 ± 2.3 | 36.0 ± 3.1 |
| Gestational Weight Gain (kg)     | 11.5 ± 5.0   | 14.0 ± 5.5  | 17.1 ± 5.4  | 10.7 ± 5.4 | 11.3 ± 8.6   | 16.4 ± 6.4 | 14.5 ± 6.7 | 11.0 ± 8.5 |
| Prepregnancy BMI                 | 17.3 ± 0.7   | 21.9 ± 1.6  | 26.6 ± 1.35 | 33.6 ± 3.7 | 17.5 ± 1.0   | 23.4 ± 1.7 | 27.2 ± 1.5 | 35.8 ± 5.3 |

Mean ± SD are shown for all continuous variables

BMI=body mass index (kg/m<sup>2</sup>); PPG=Diabetes in Pregnancy Program Project; CSL=Consortium on Safe Labor.

BMI was defined as: underweight (BMI<18.5 kg/m<sup>2</sup>); normal (18.5 kg/m<sup>2</sup>≤BMI<25.0 kg/m<sup>2</sup>); overweight (25.0 kg/m<sup>2</sup>≤BMI<30.0 kg/m<sup>2</sup>); obese (BMI≥30.0 kg/m<sup>2</sup>).
